# Supplementary material for: One-pot three-component selective synthesis of isoindolo[2,1-a]quinazoline derivatives via a palladium-catalyzed cascade cyclocondensation/cyclocarbonylation sequence
Source: Royal Society of Chemistry journal article supplement (doi:10.1039/c7ob00256d), 2017-01-01

## Supporting Information for

### **One-pot three-component selective synthesis of isoindolo[2,1-*a*]quinazoline derivatives via palladium-catalyzed cascade cyclocondensation/cyclocarbonylation sequence**

*Shenghai Guo,\* Jianhui Zhai, Fang Wang, and Xuesen Fan\**

*Collaborative Innovation Center of Henan Province for Green Manufacturing of Fine  
Chemicals, Key Laboratory of Green Chemical Media and Reactions, Ministry of Education,  
School of Chemistry and Chemical Engineering, Henan Normal University, Xinxiang, Henan  
453007, P. R. China. E-mail: [shguo@htu.cn](mailto:shguo@htu.cn); [xuesen.fan@htu.cn](mailto:xuesen.fan@htu.cn)*

### **Table of Content**

|                                                                                  |               |
|----------------------------------------------------------------------------------|---------------|
| <b><sup>1</sup>H and <sup>13</sup>C NMR Spectra of Compounds 3a-3u, 4, and 5</b> | <b>S2-S24</b> |
|----------------------------------------------------------------------------------|---------------|

# <sup>1</sup>H and <sup>13</sup>C NMR Spectra of Compounds 3a-3u, 4, and 5

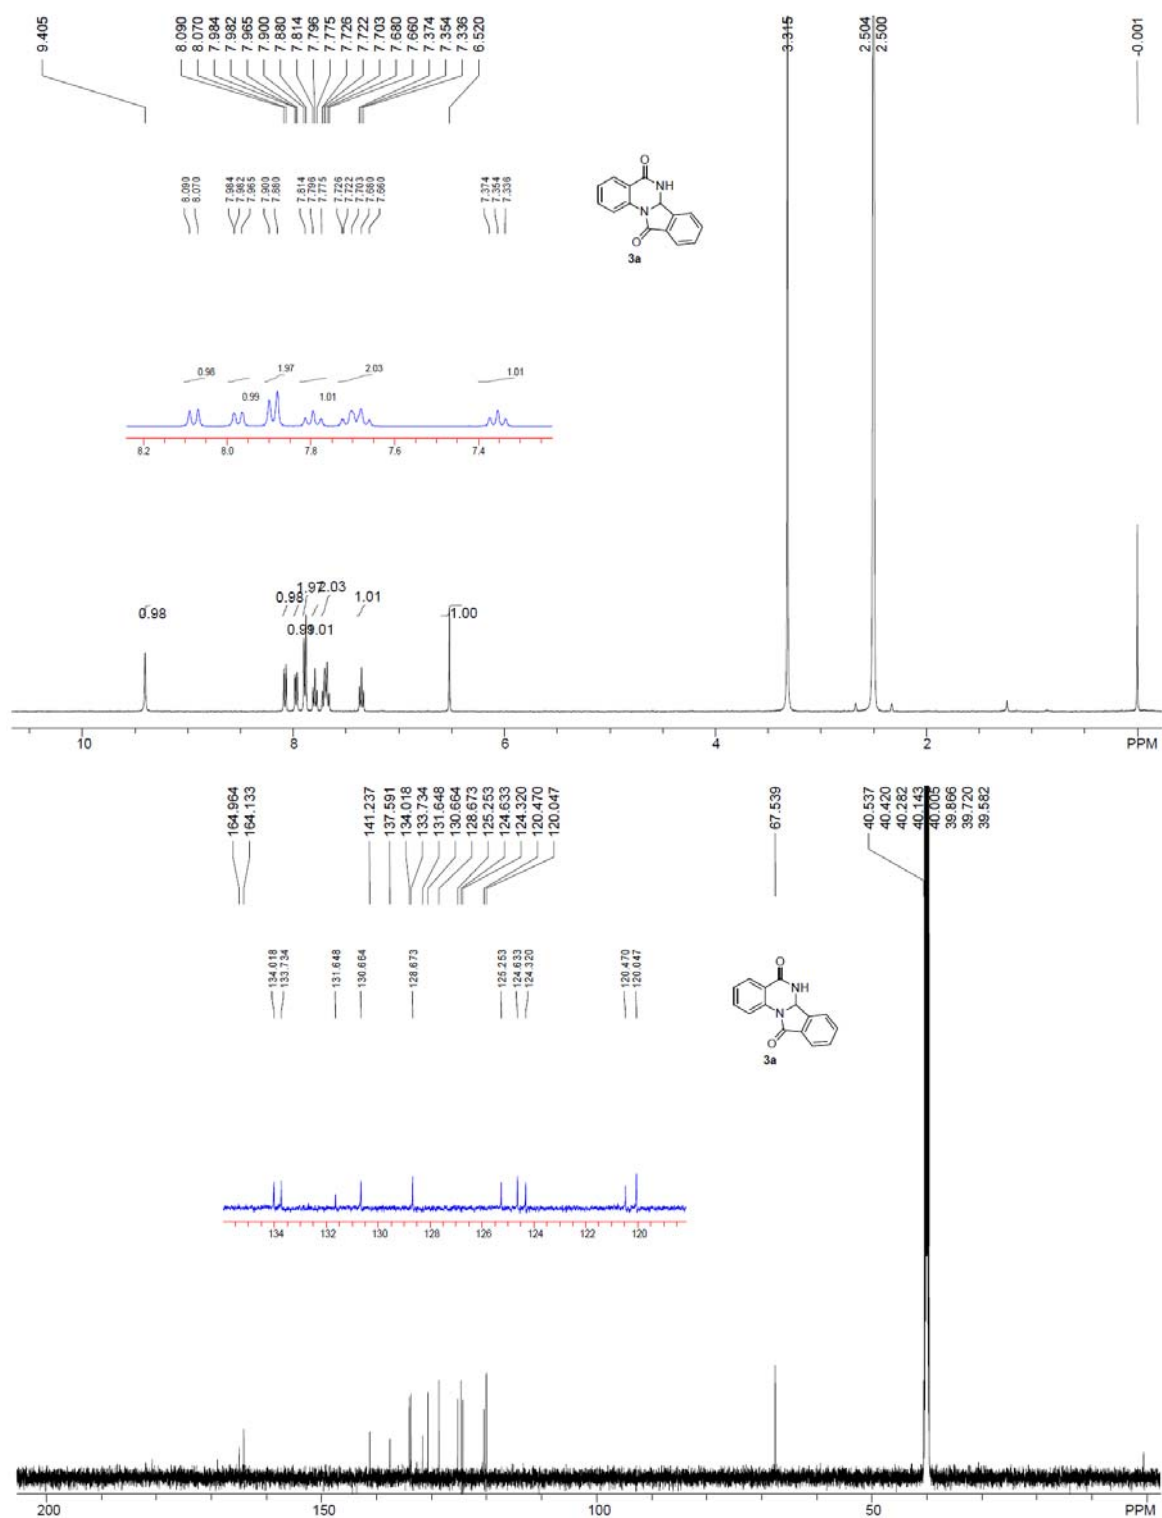

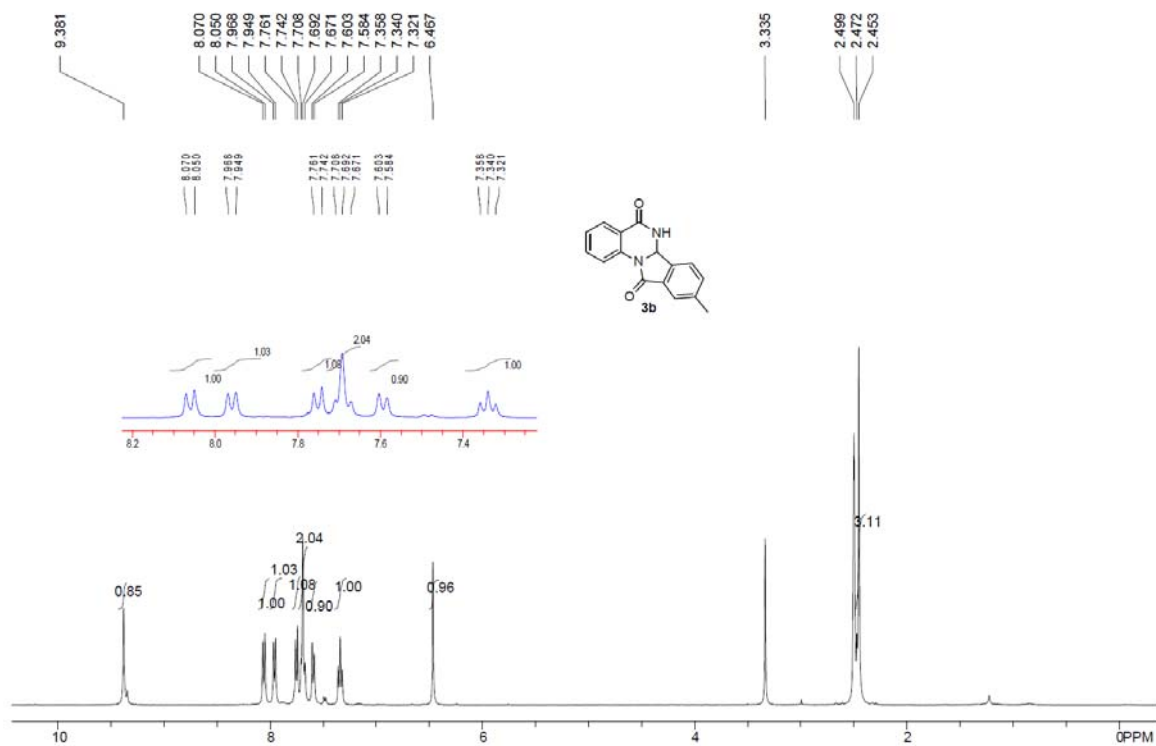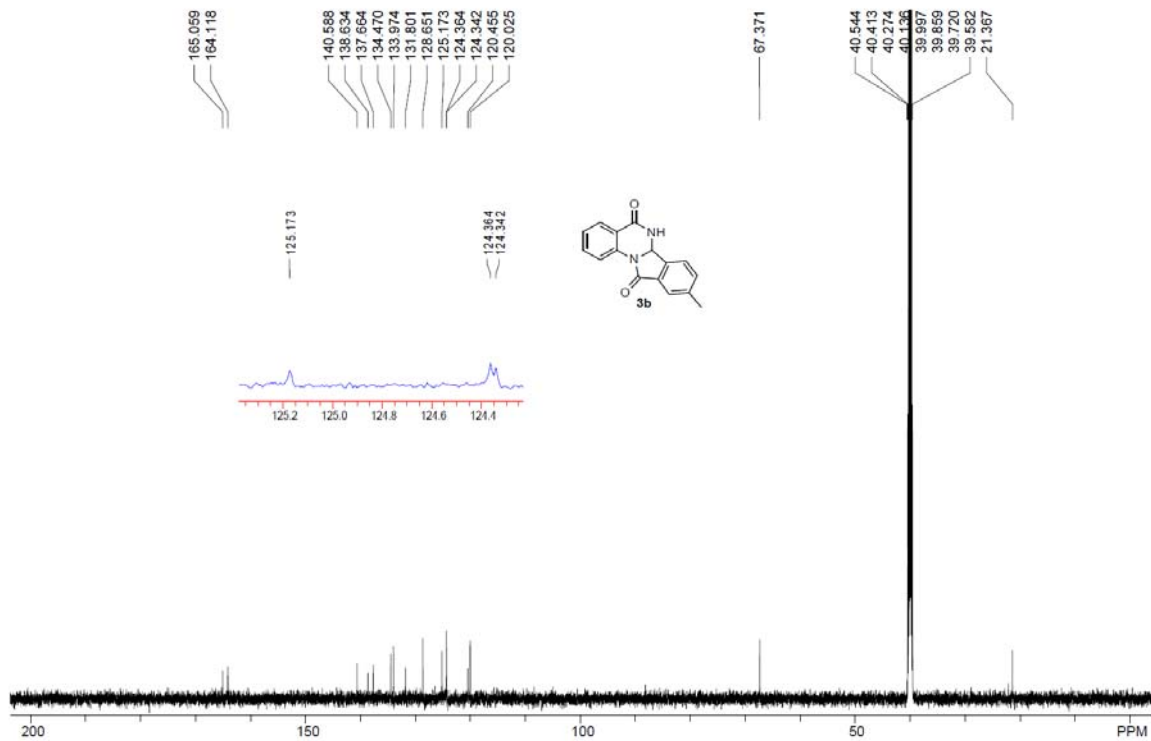

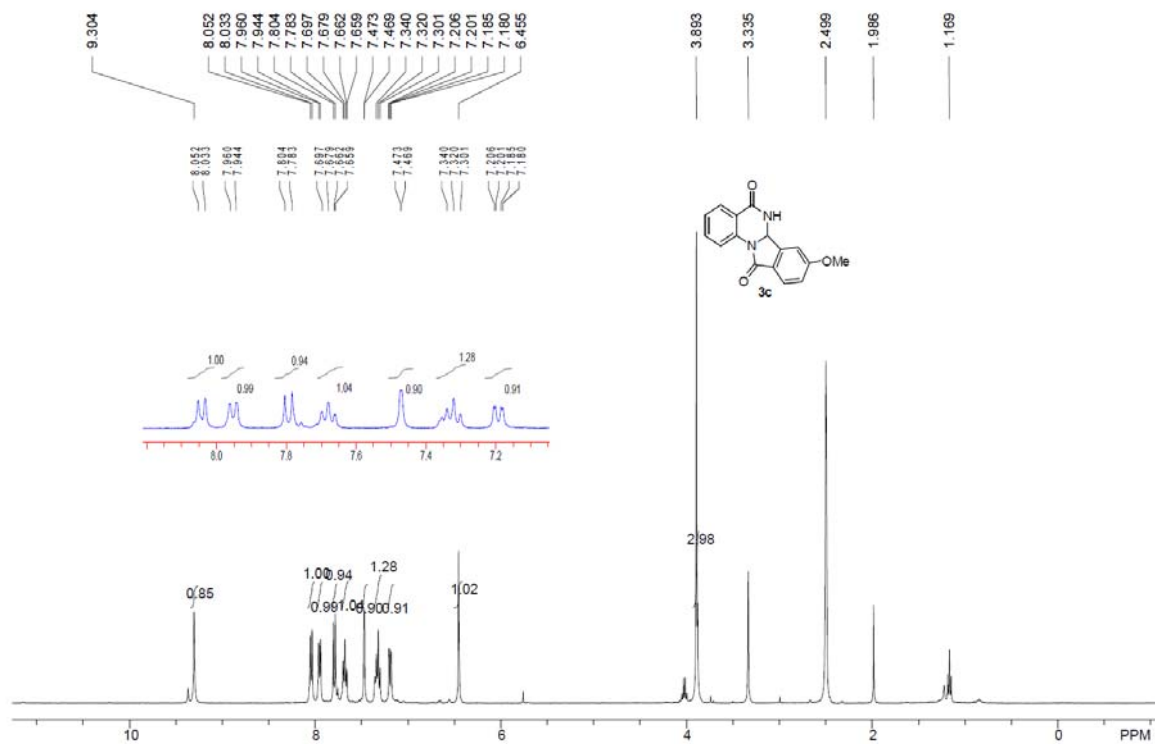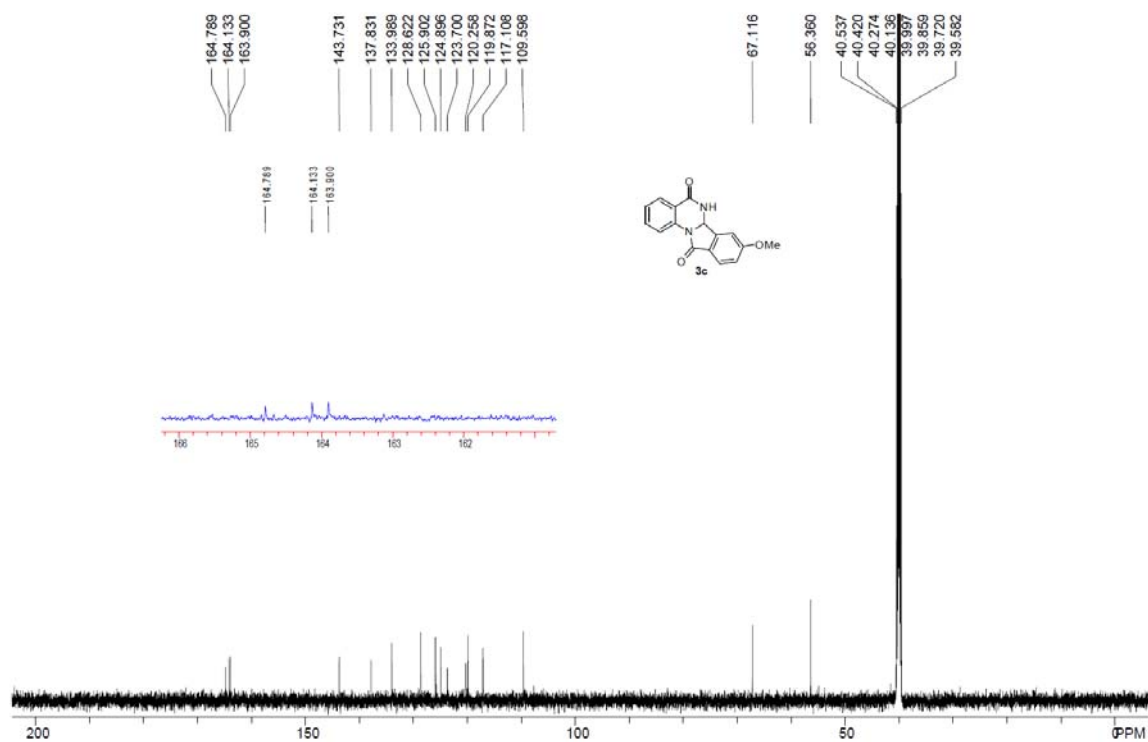

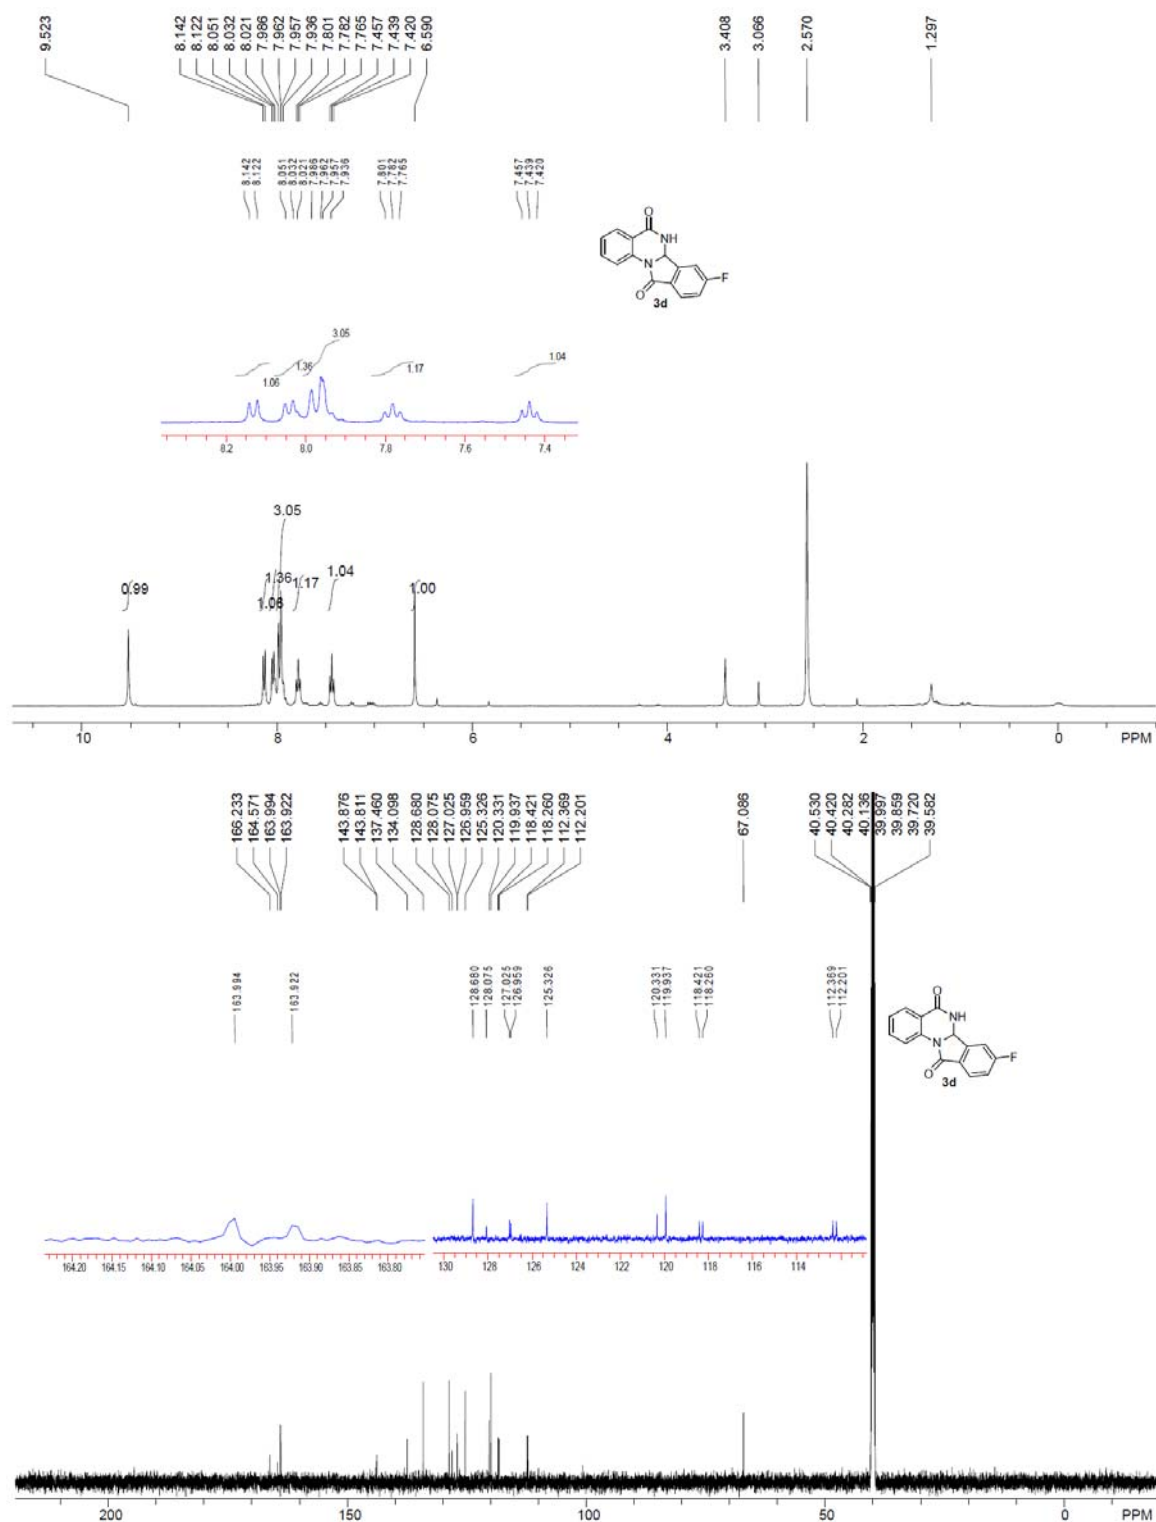

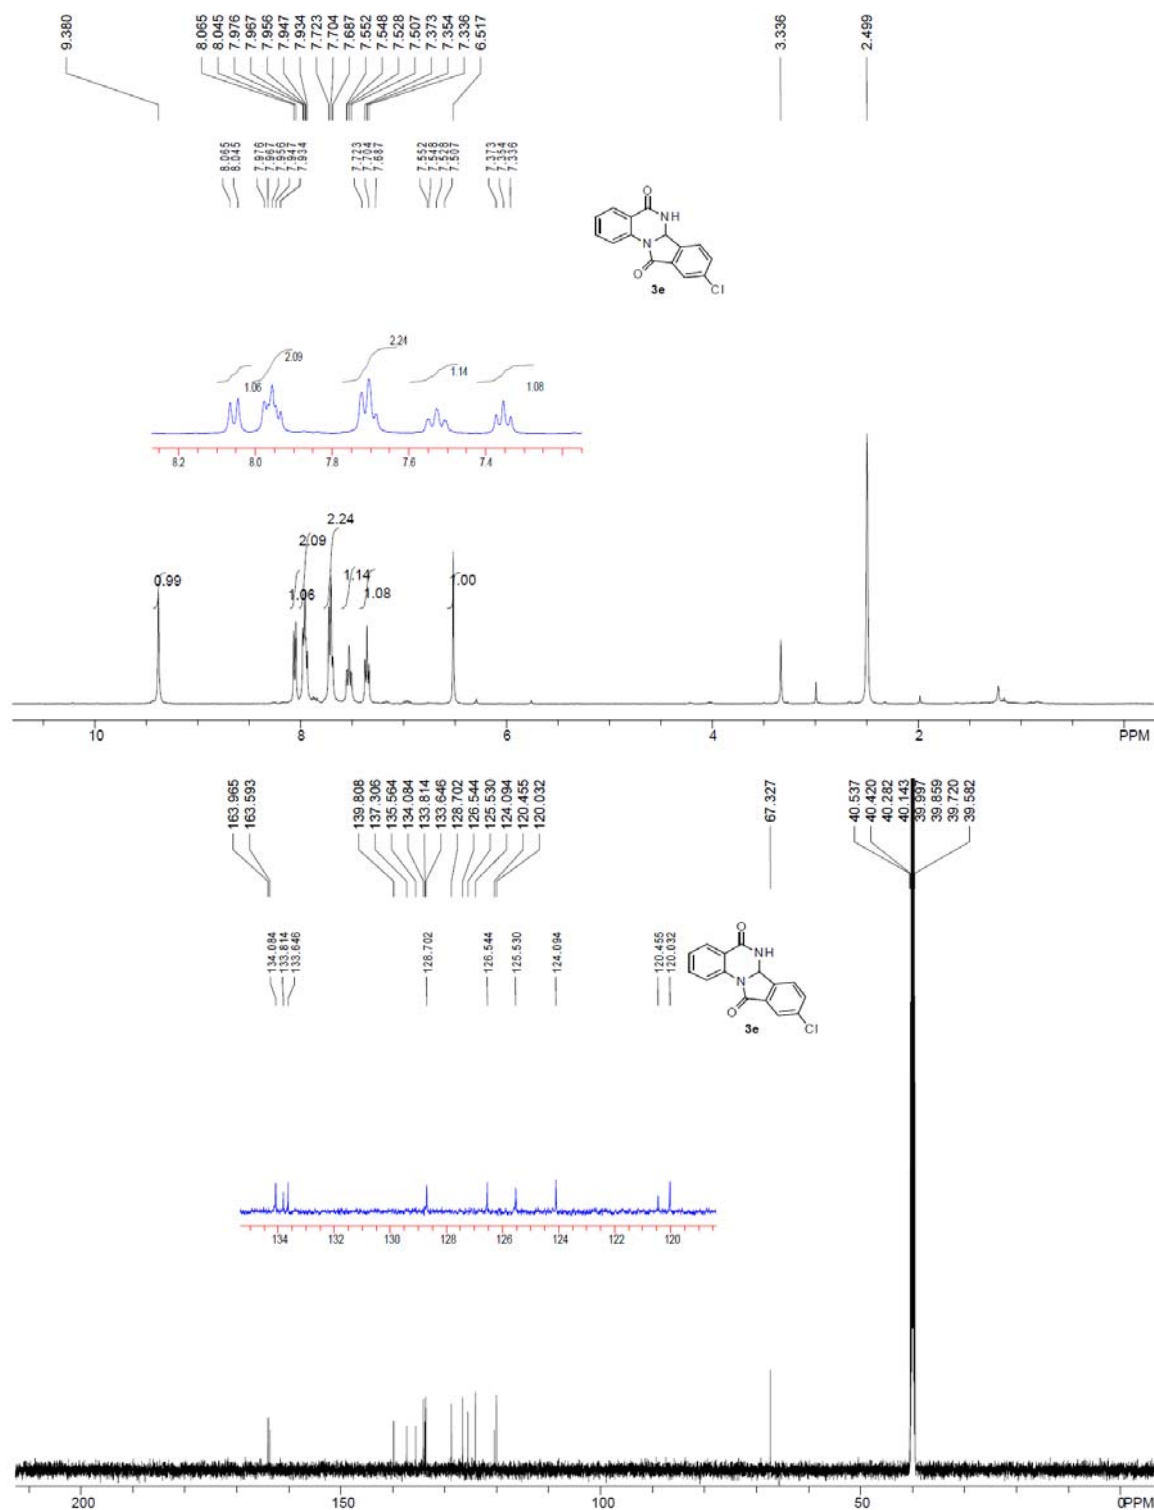

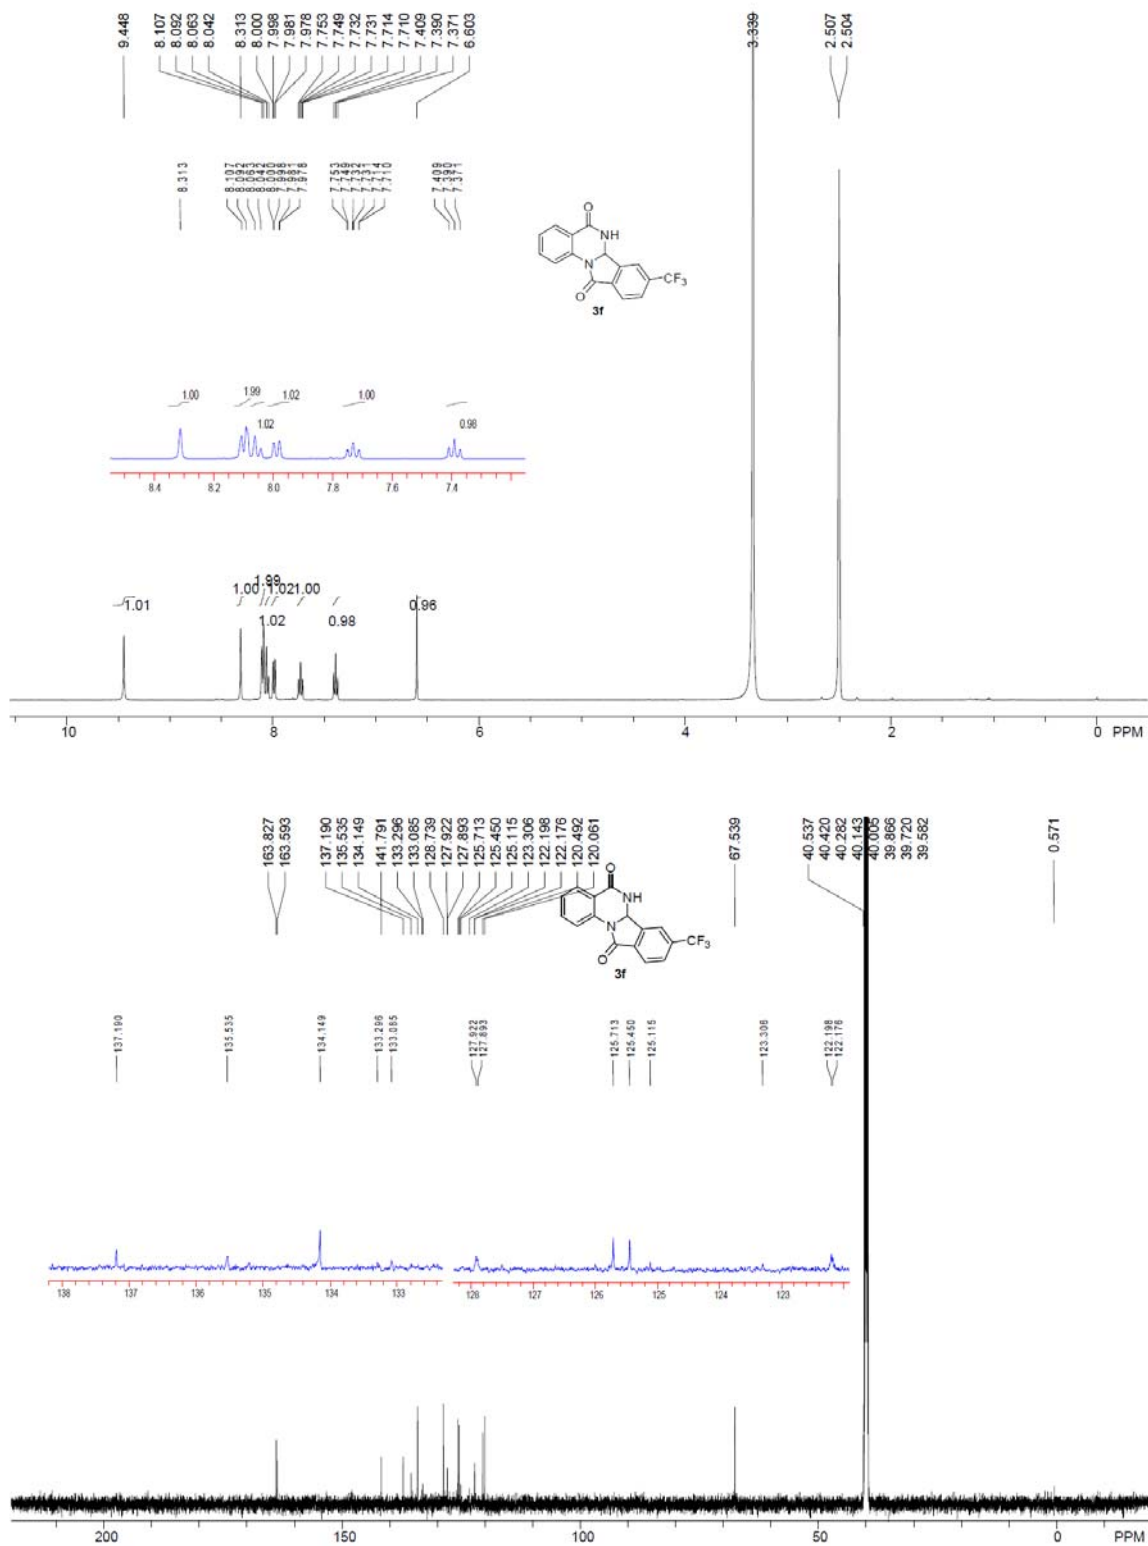

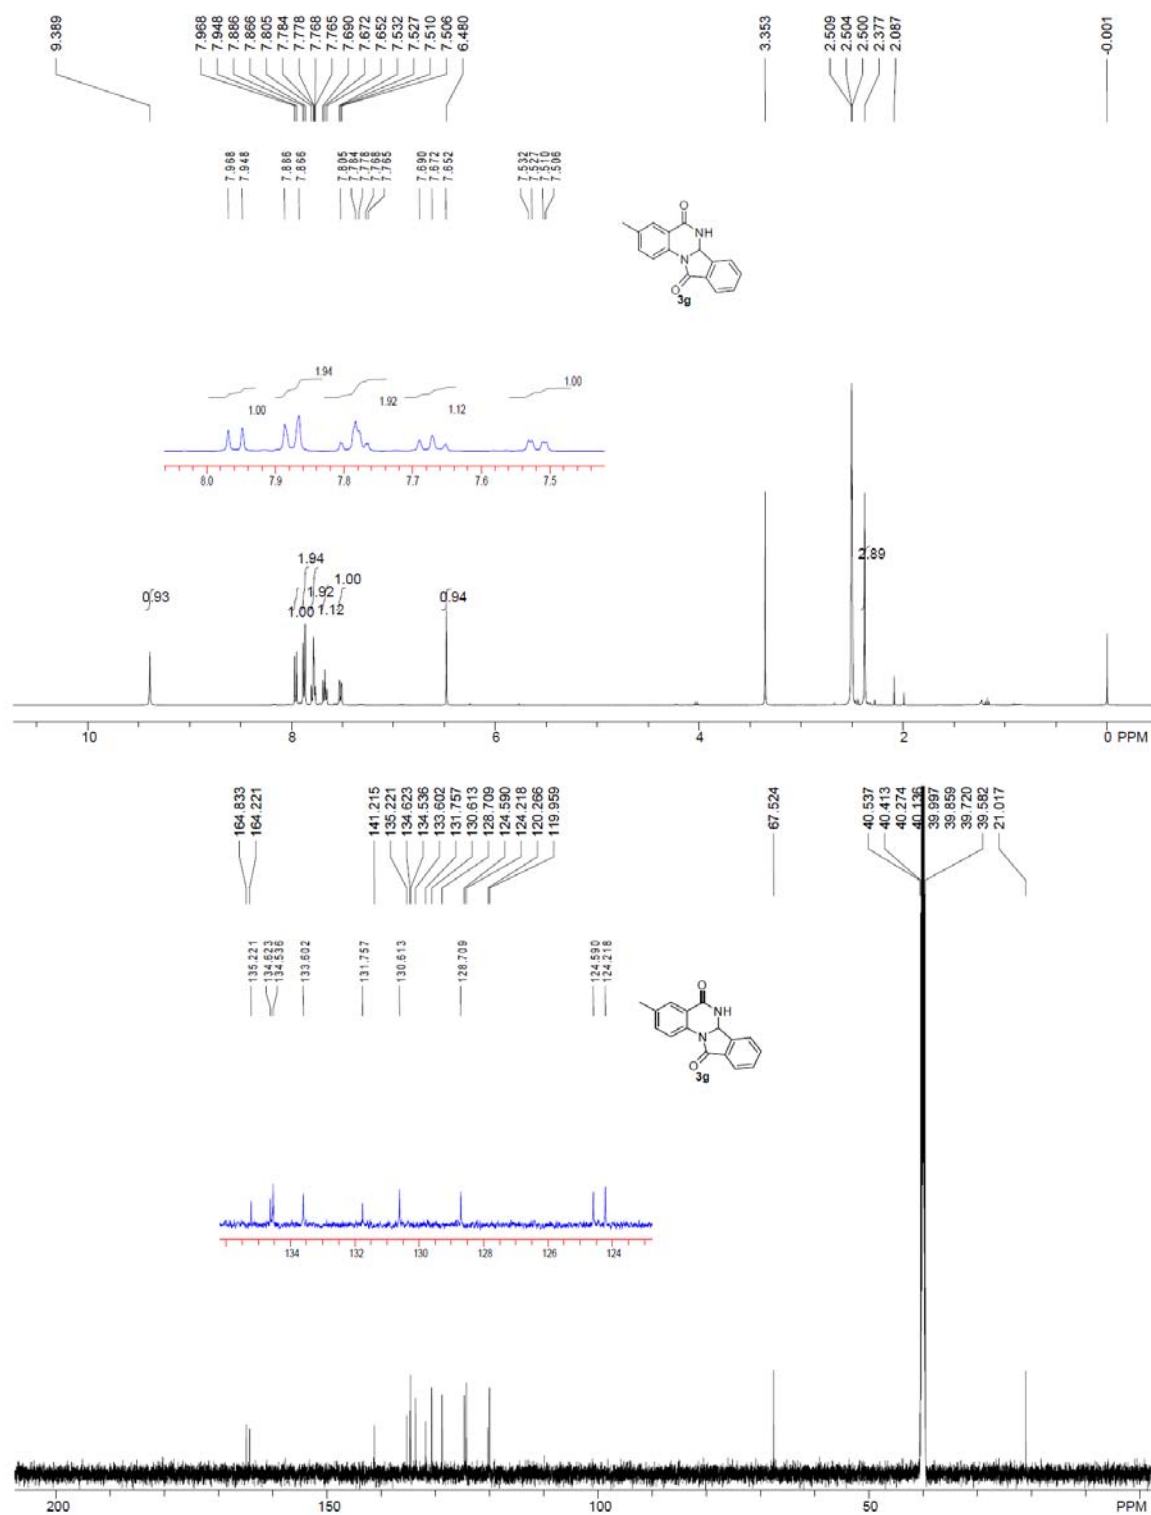



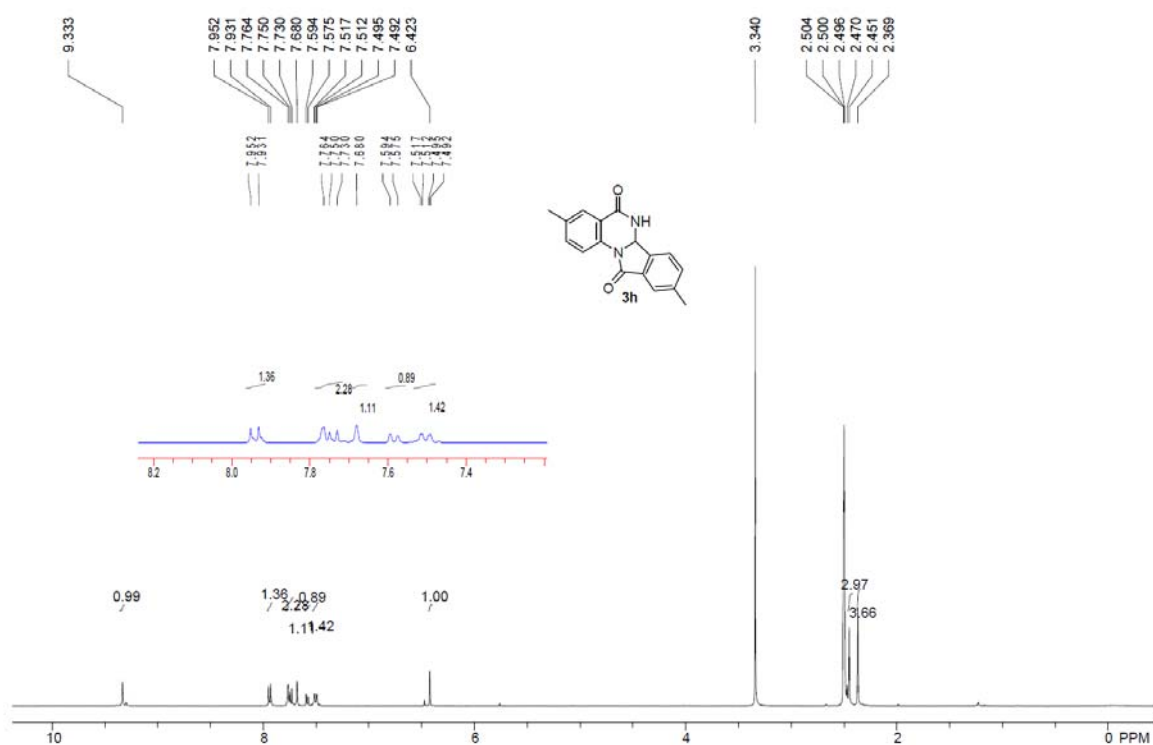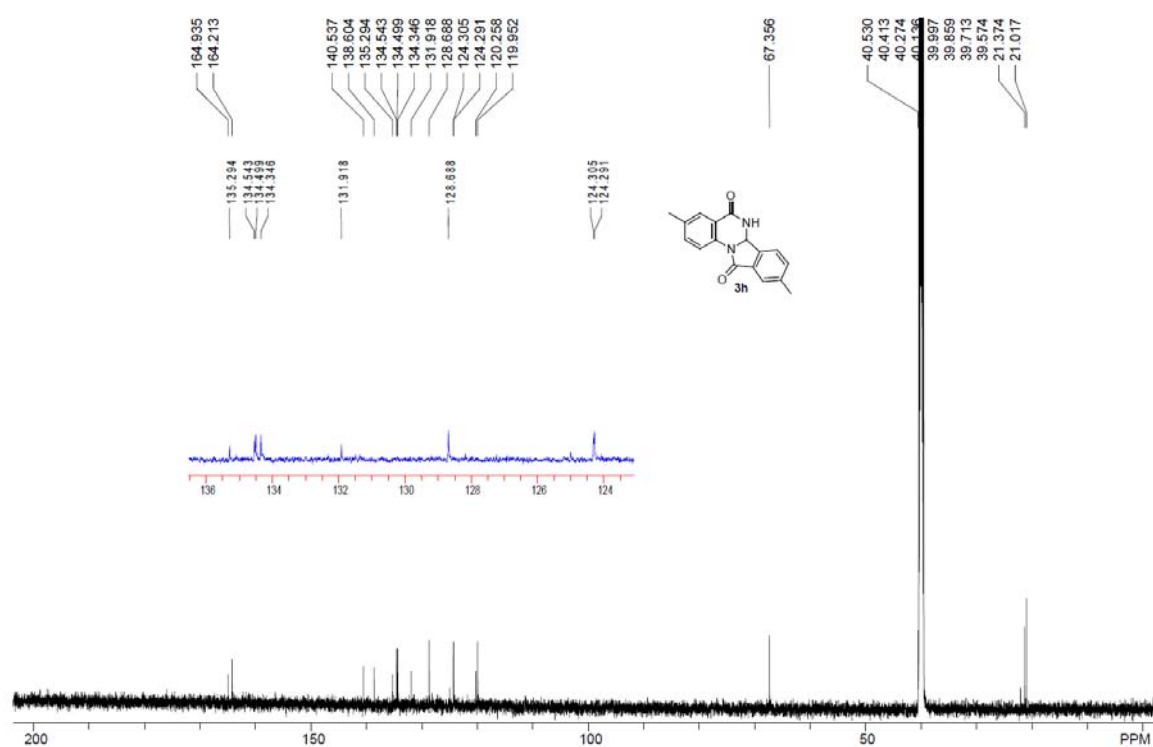

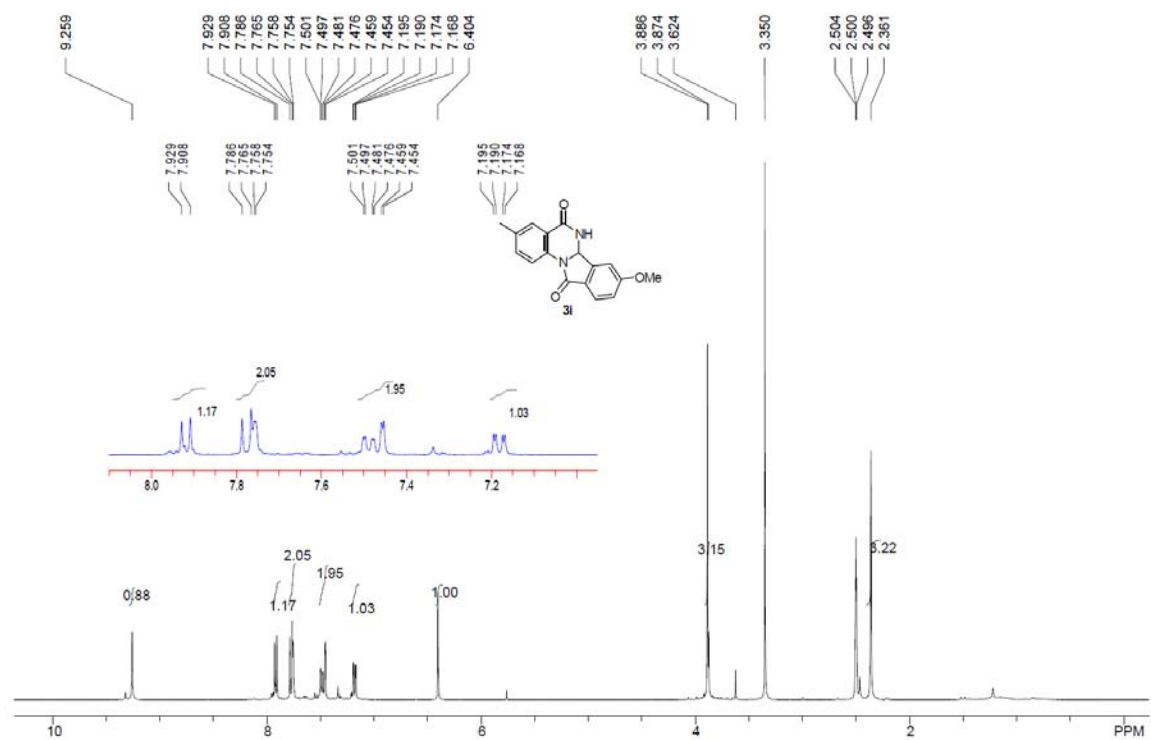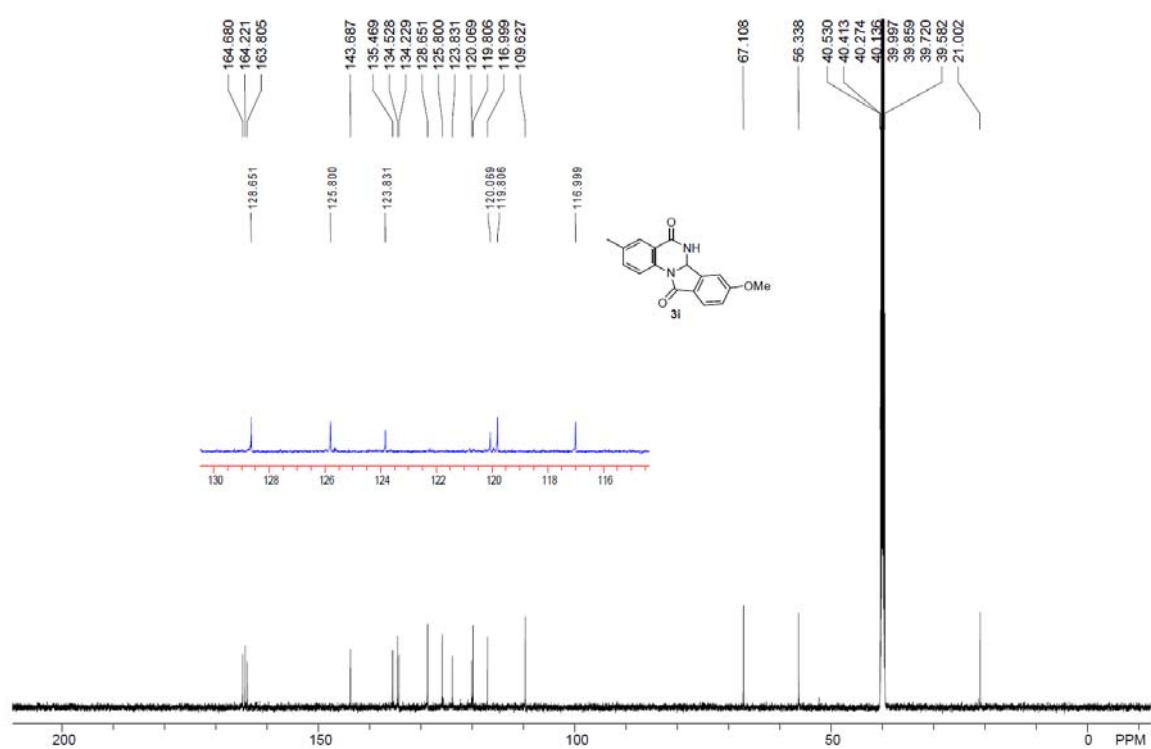

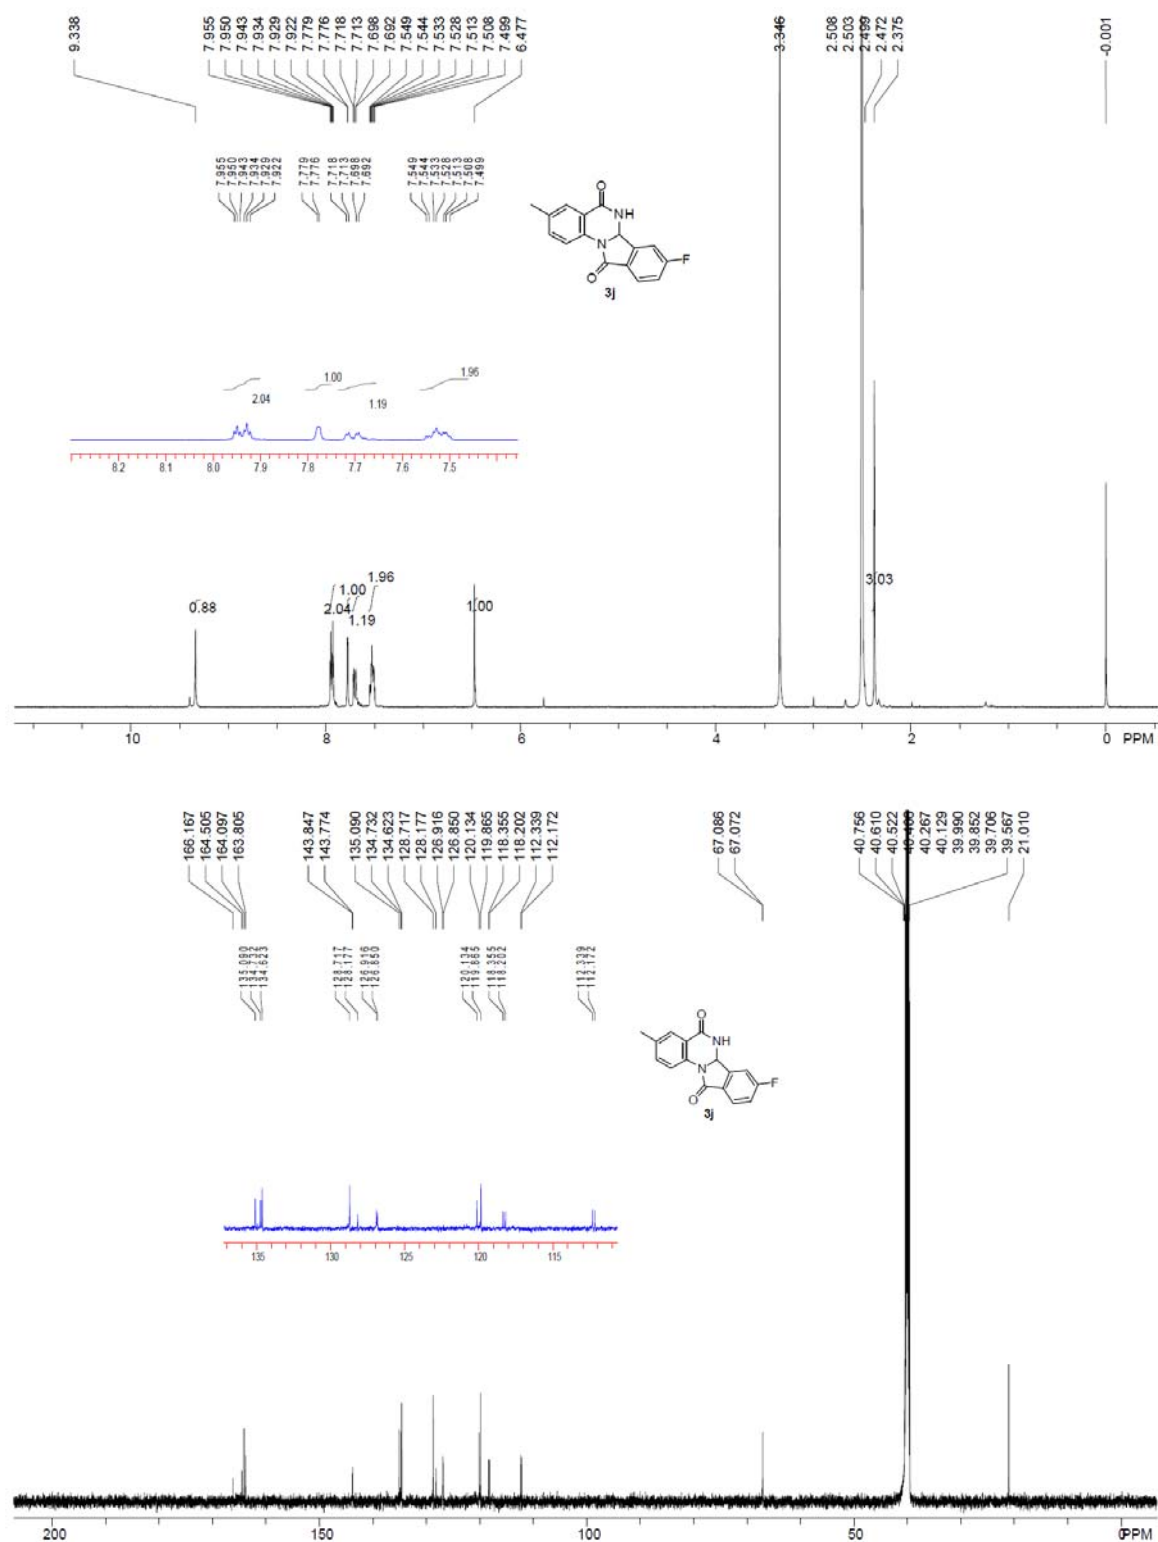

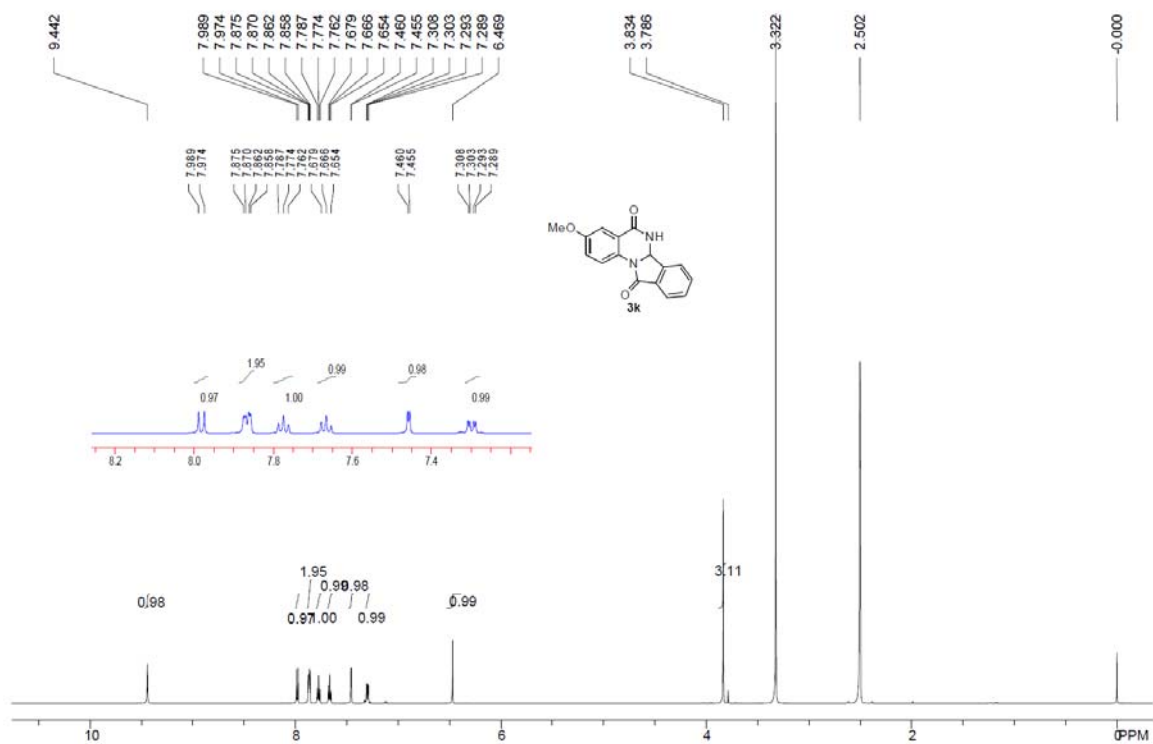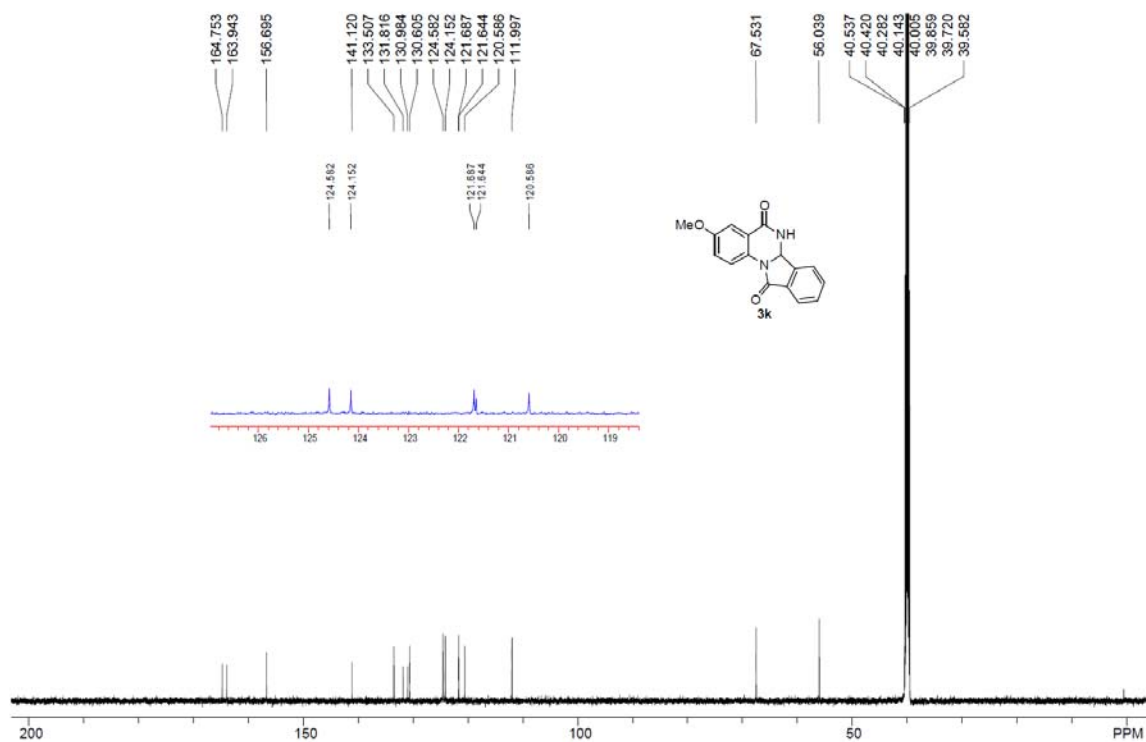

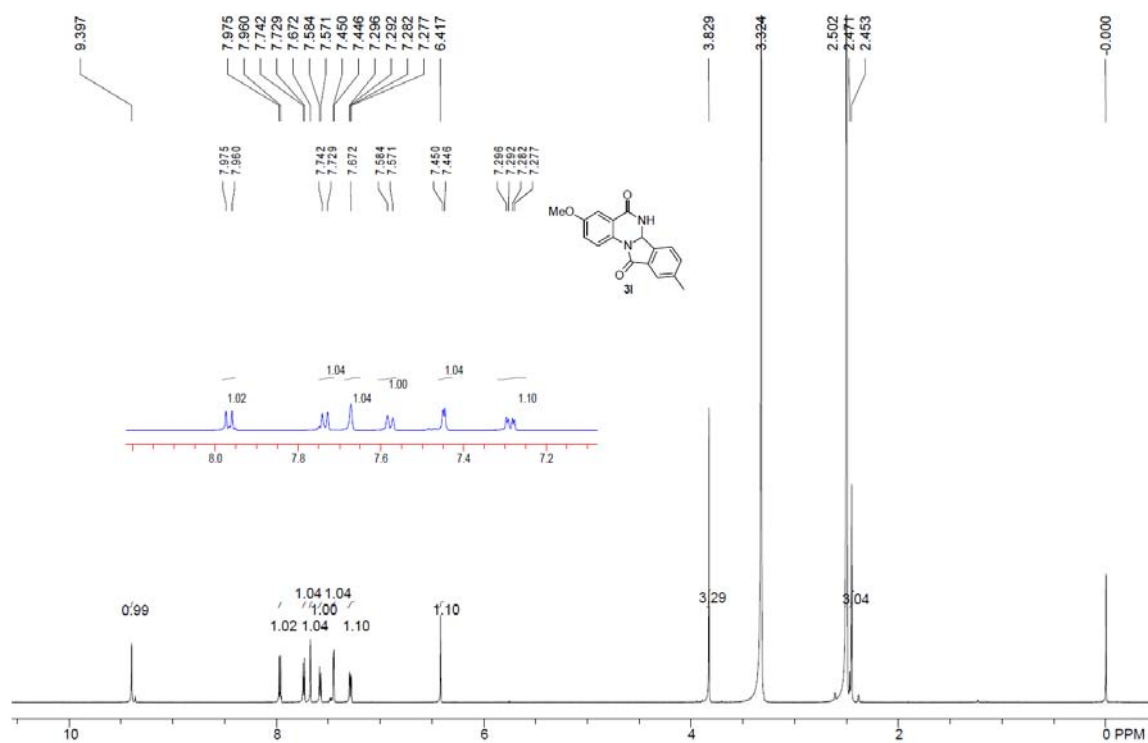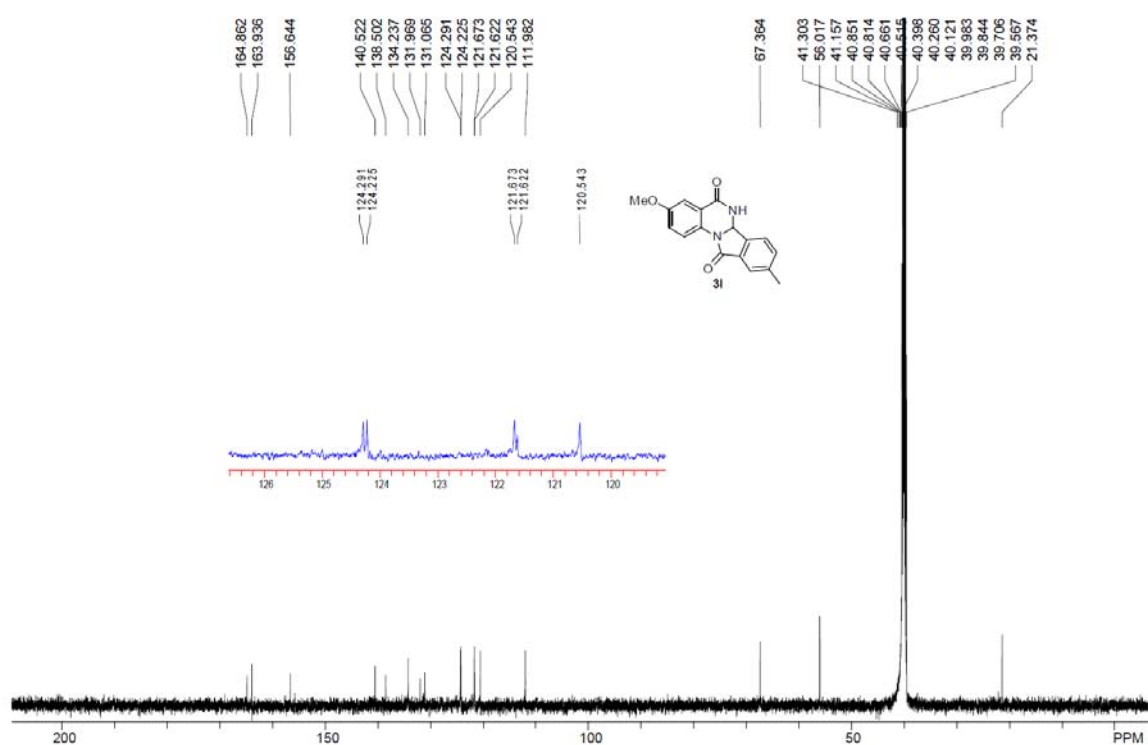

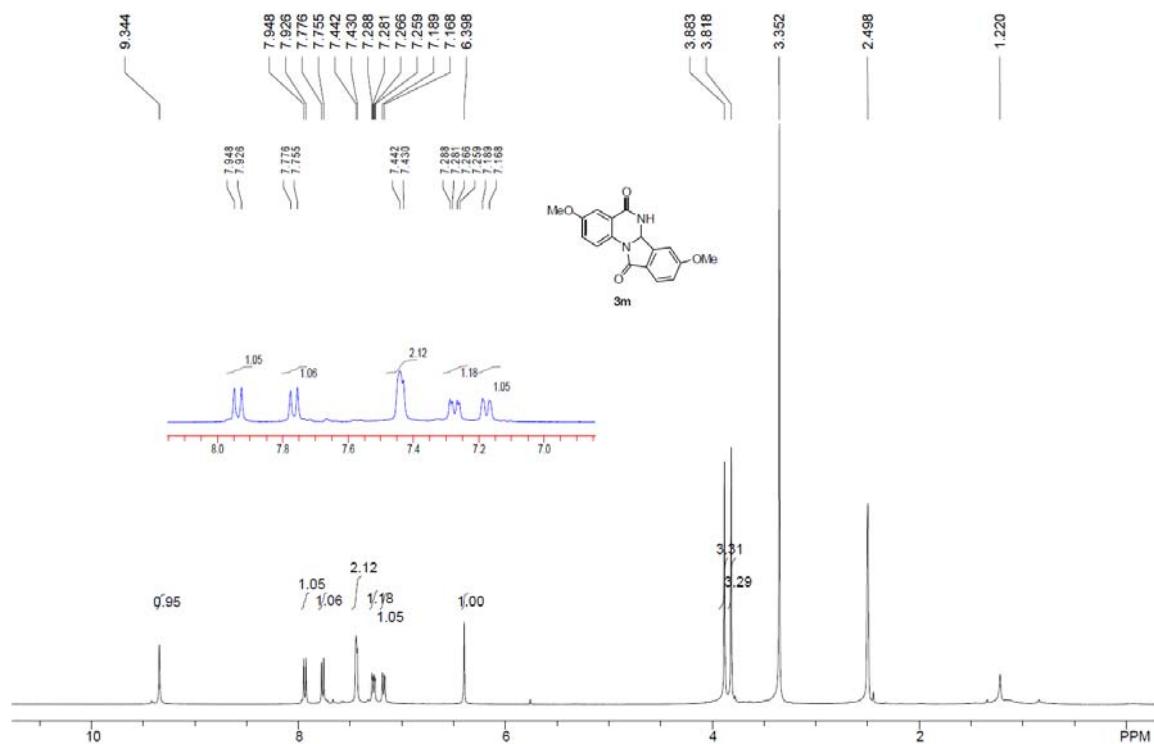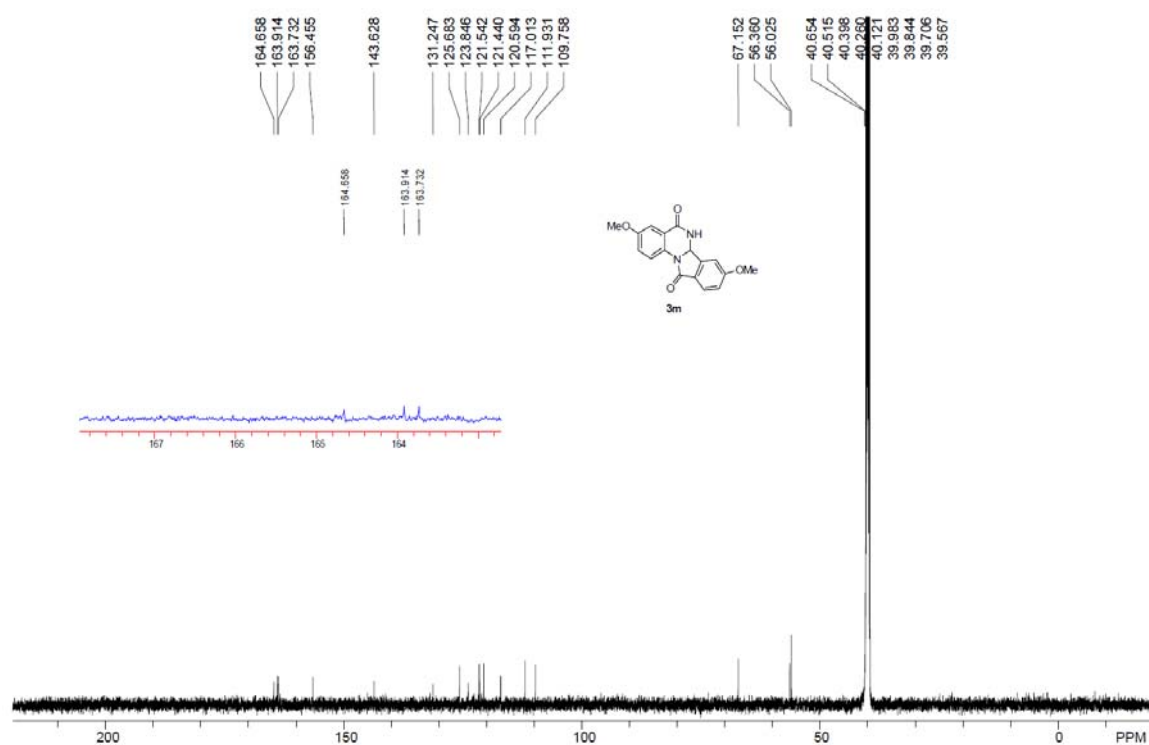

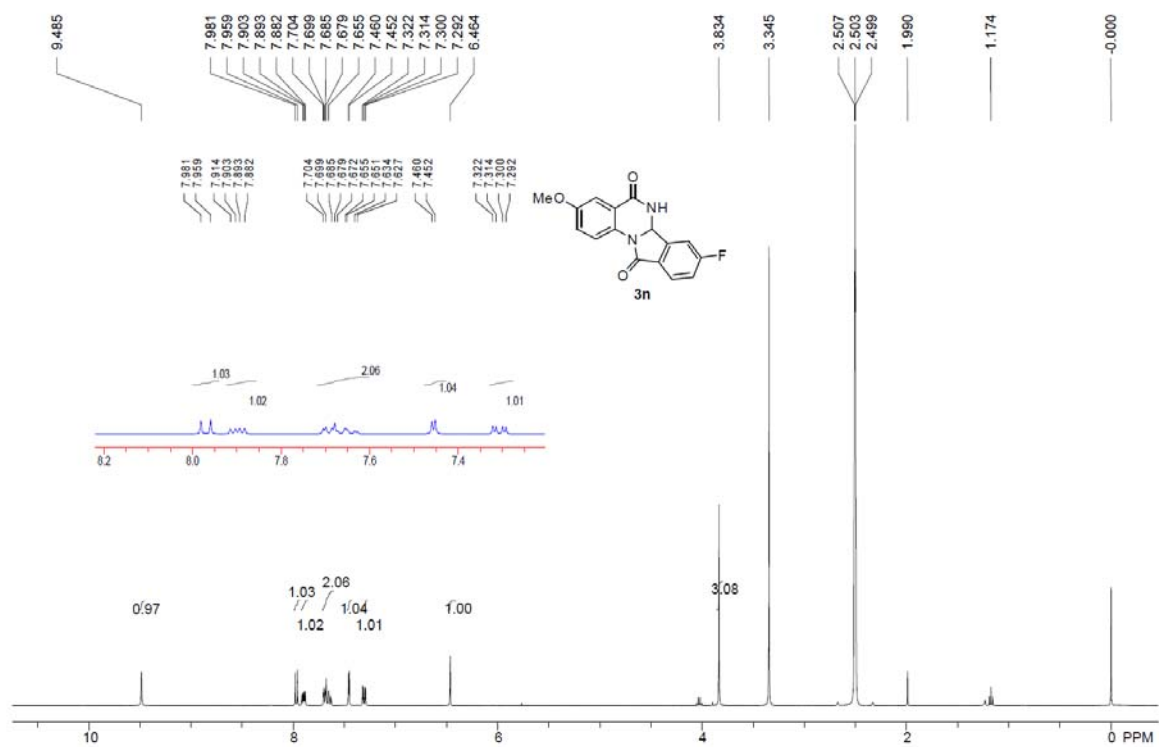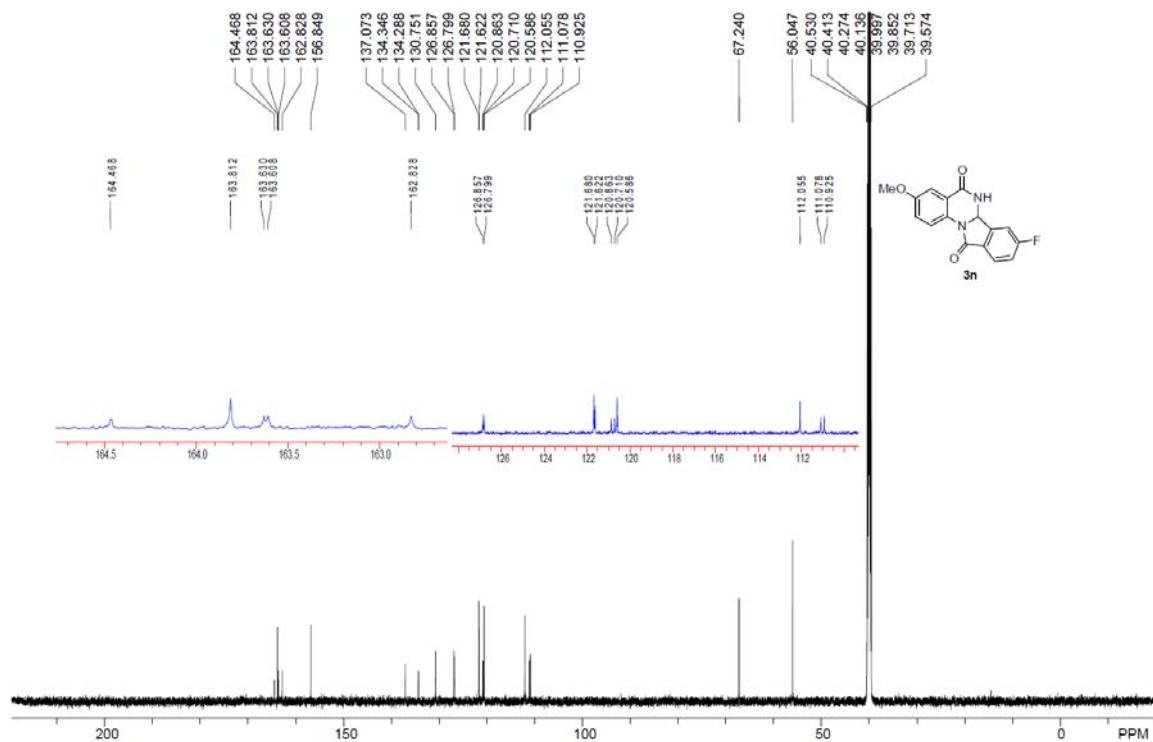

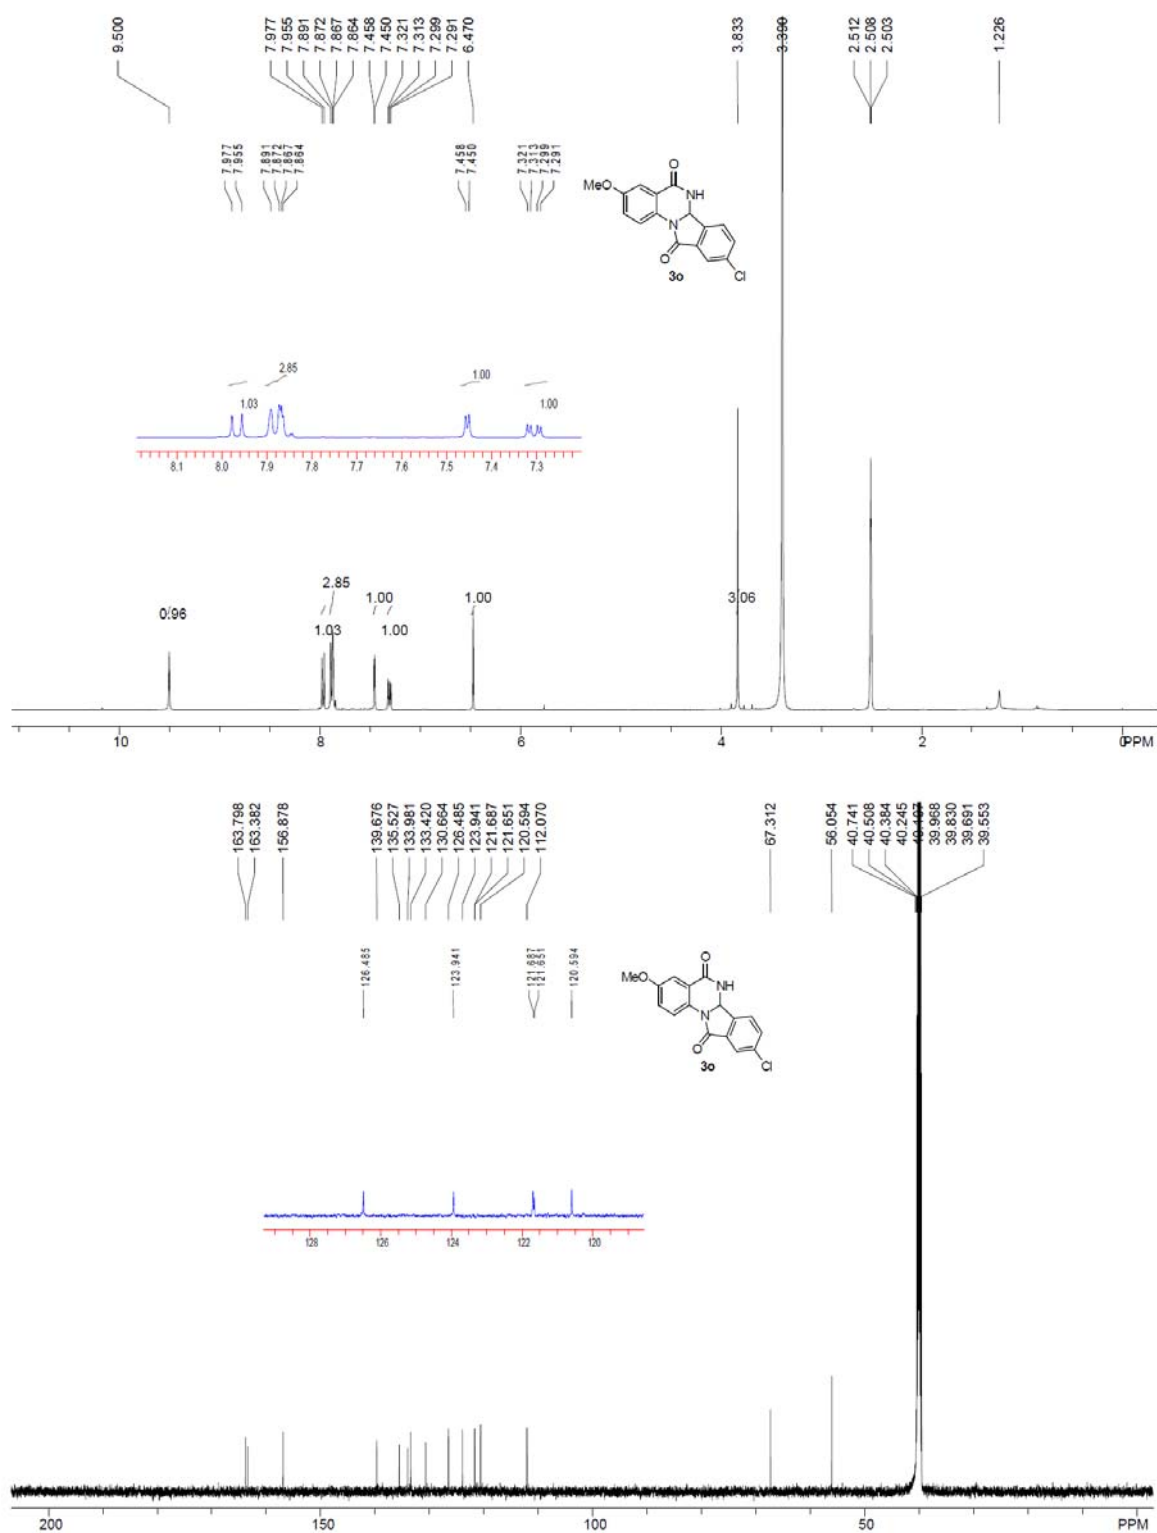



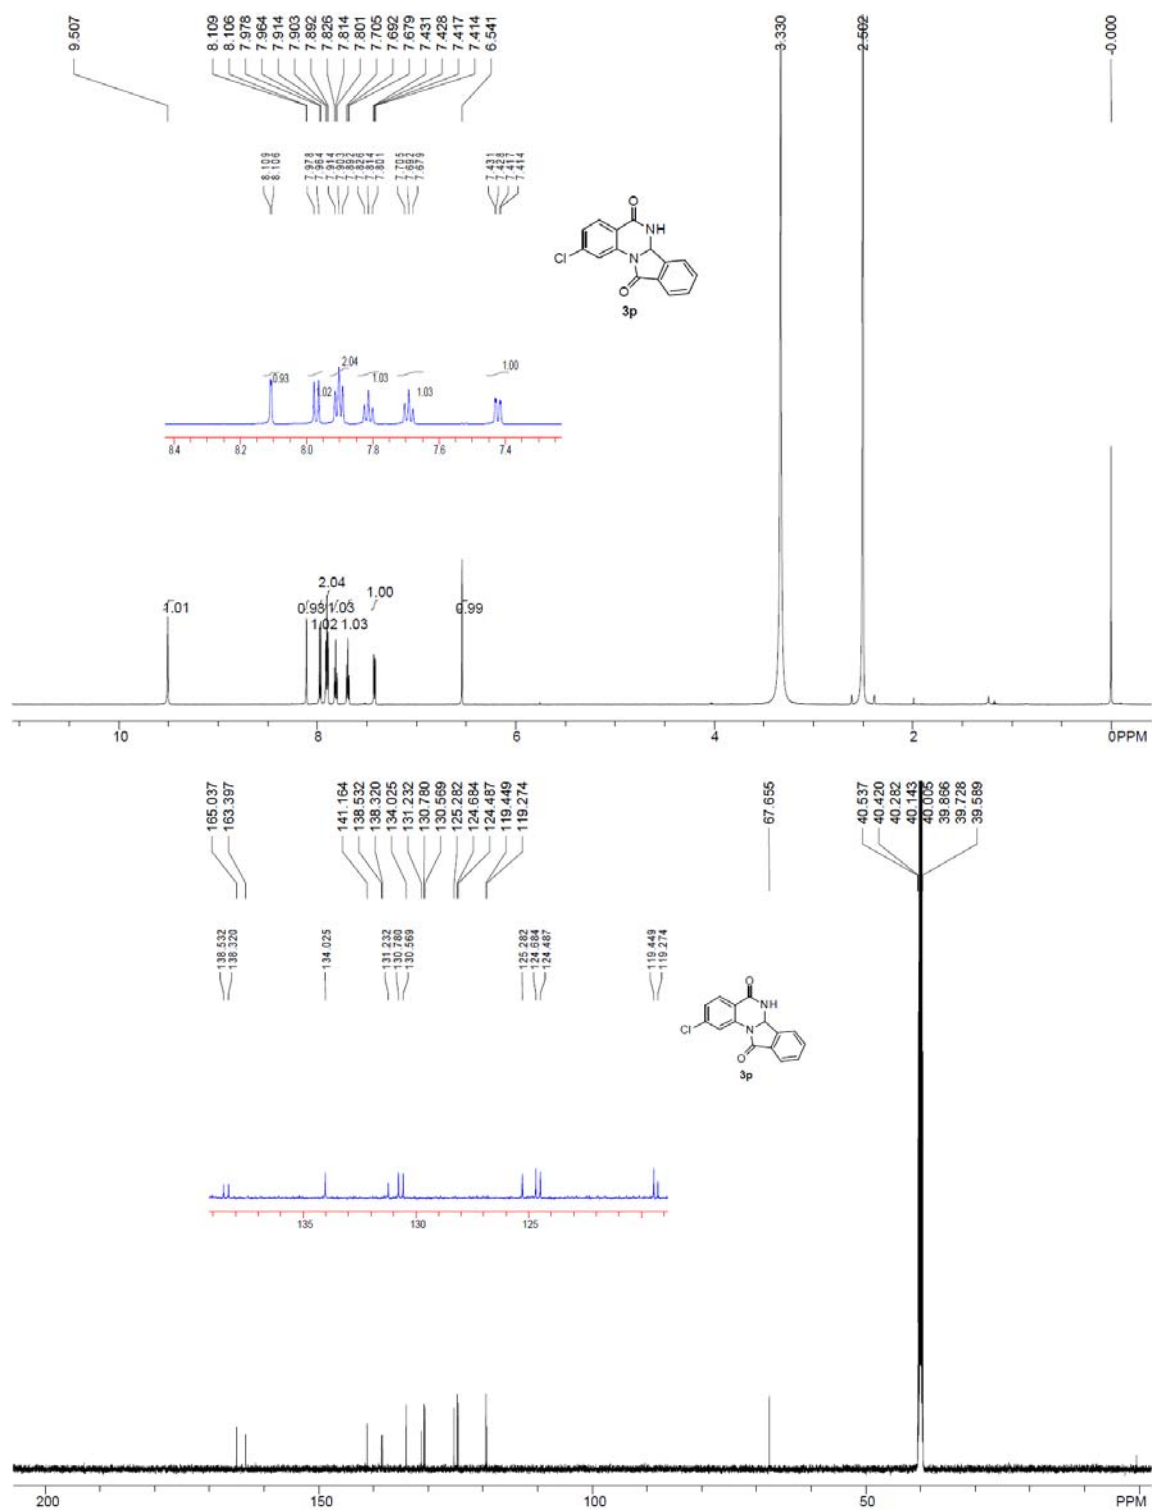

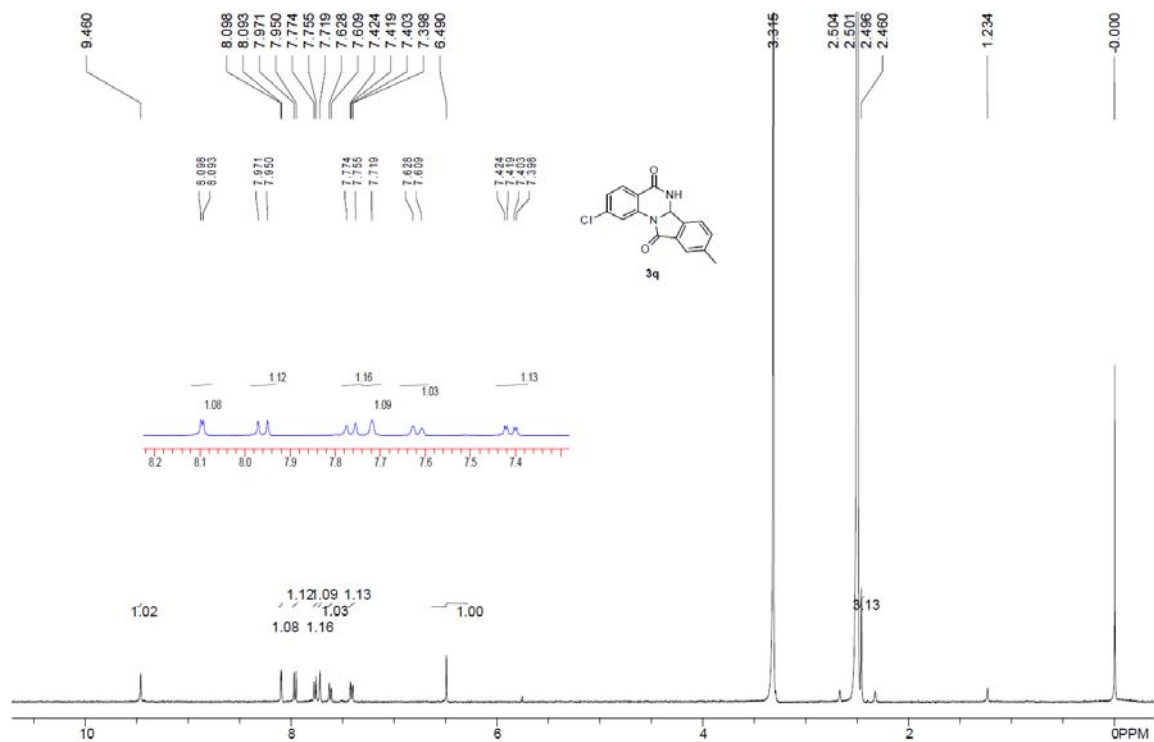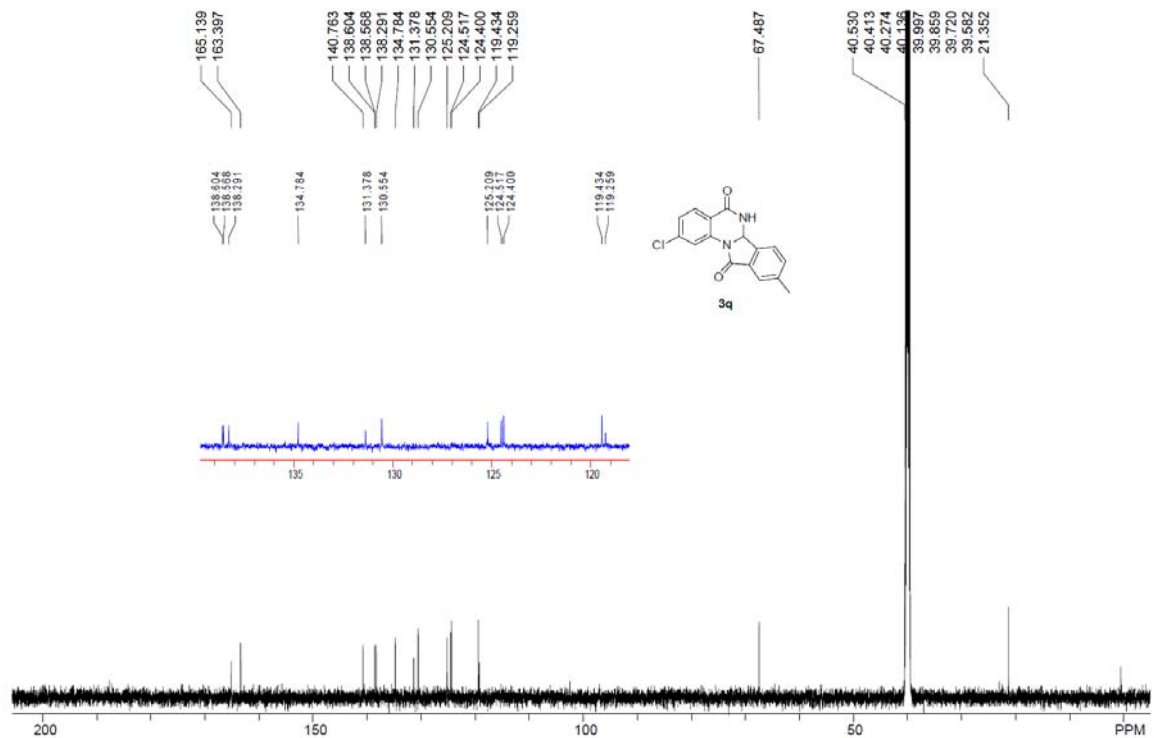

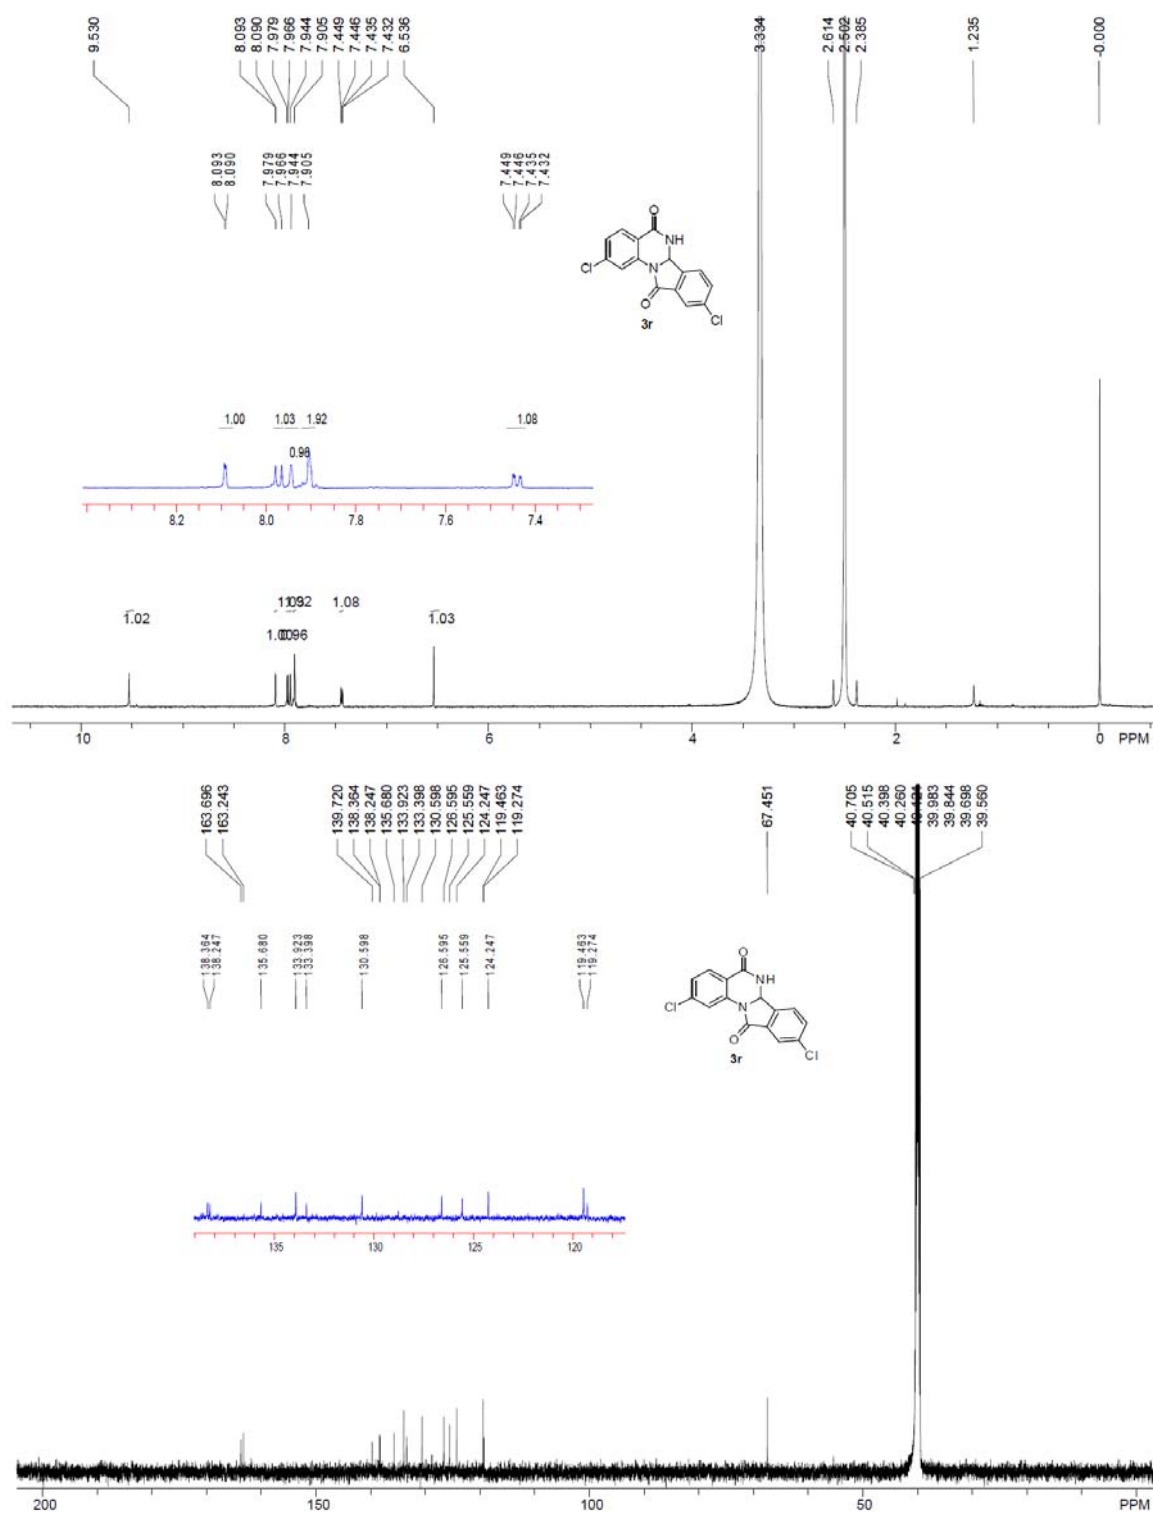

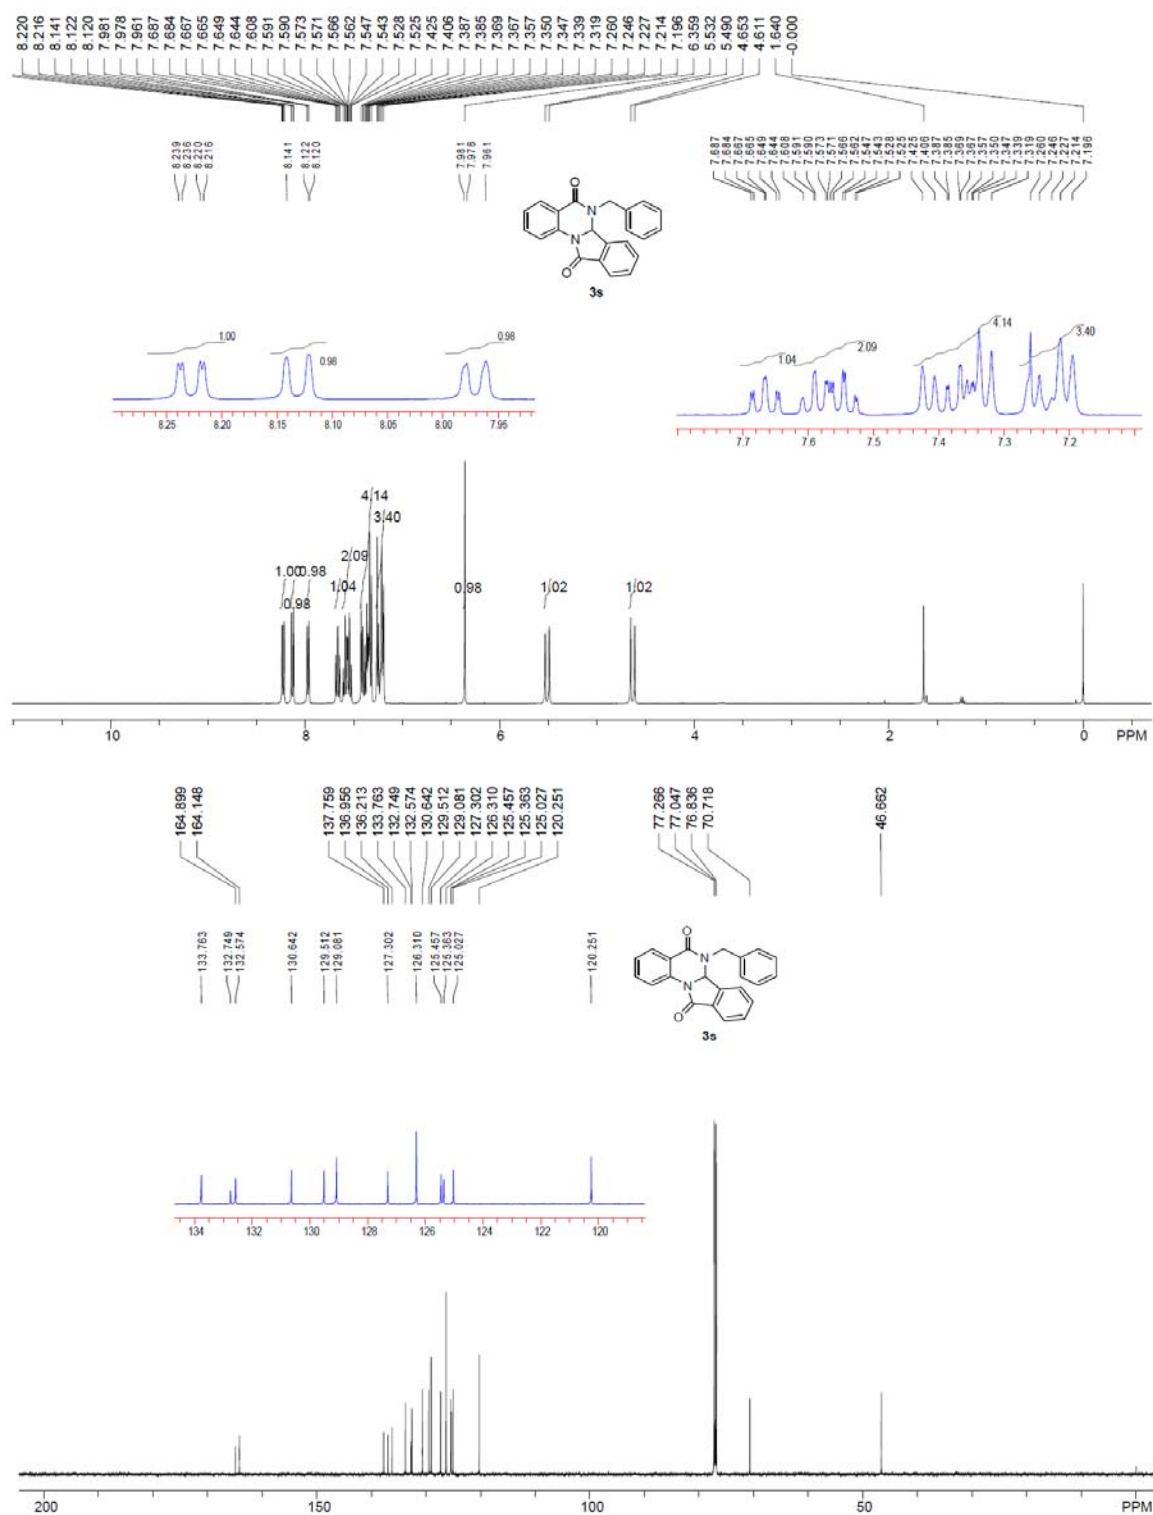

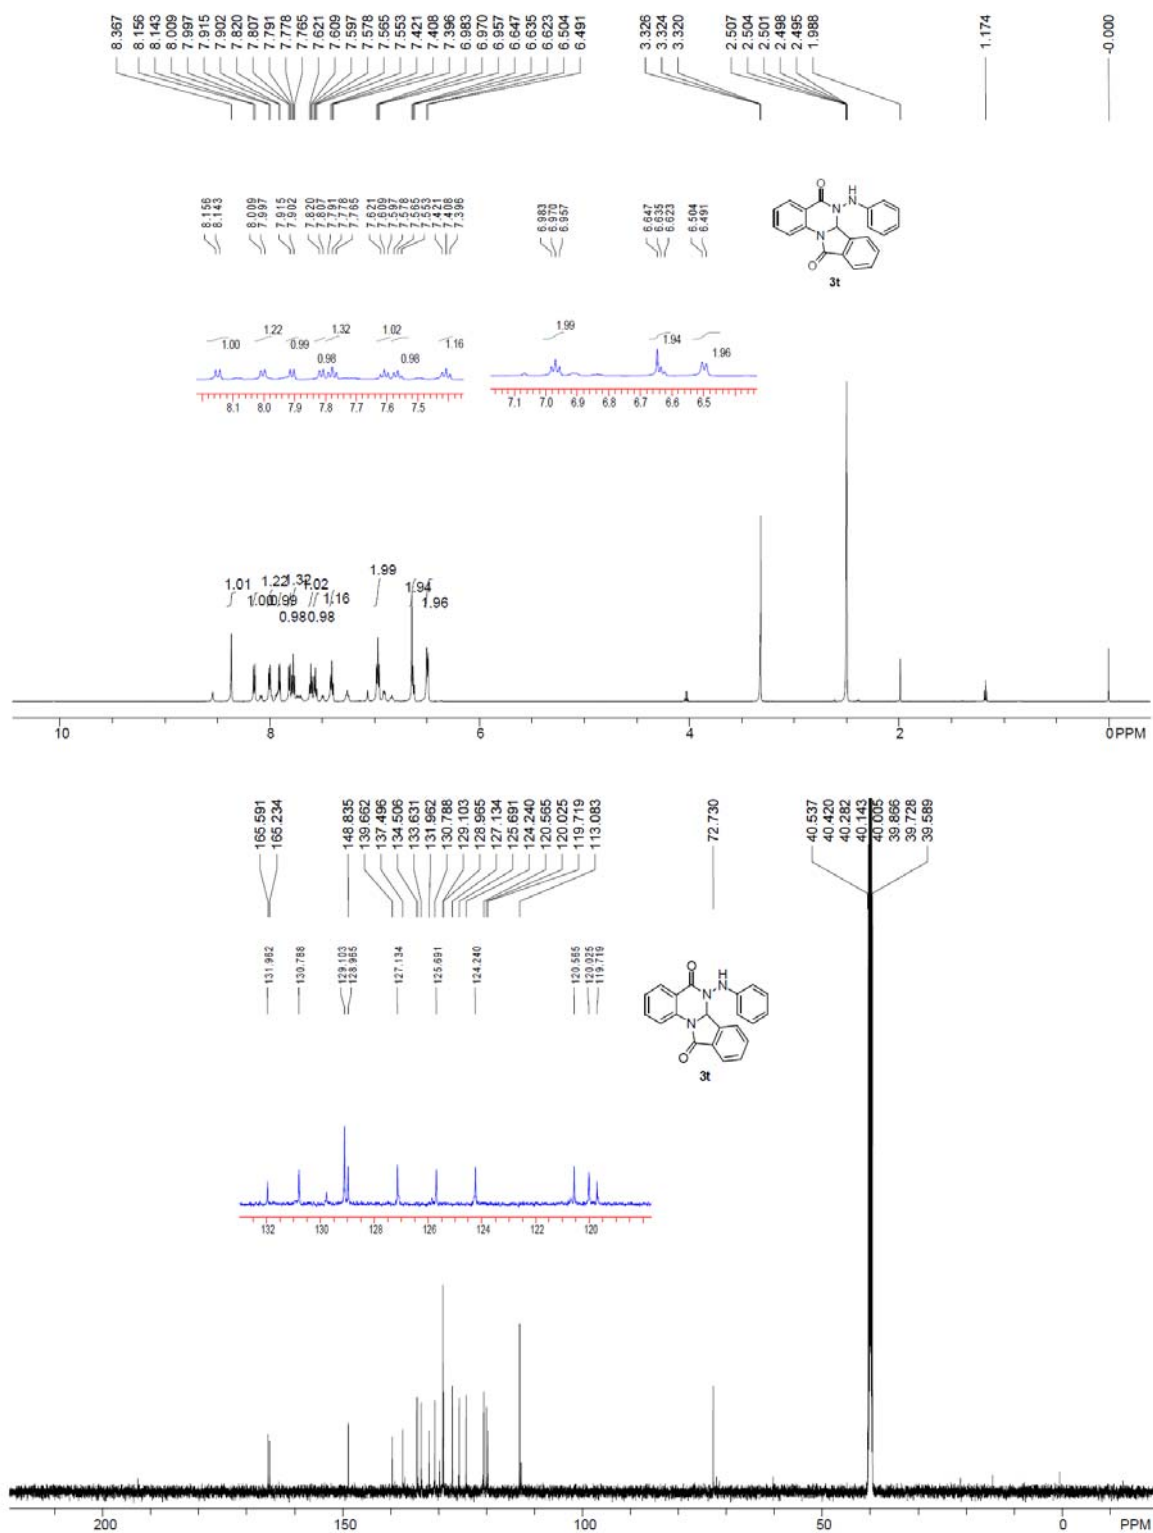

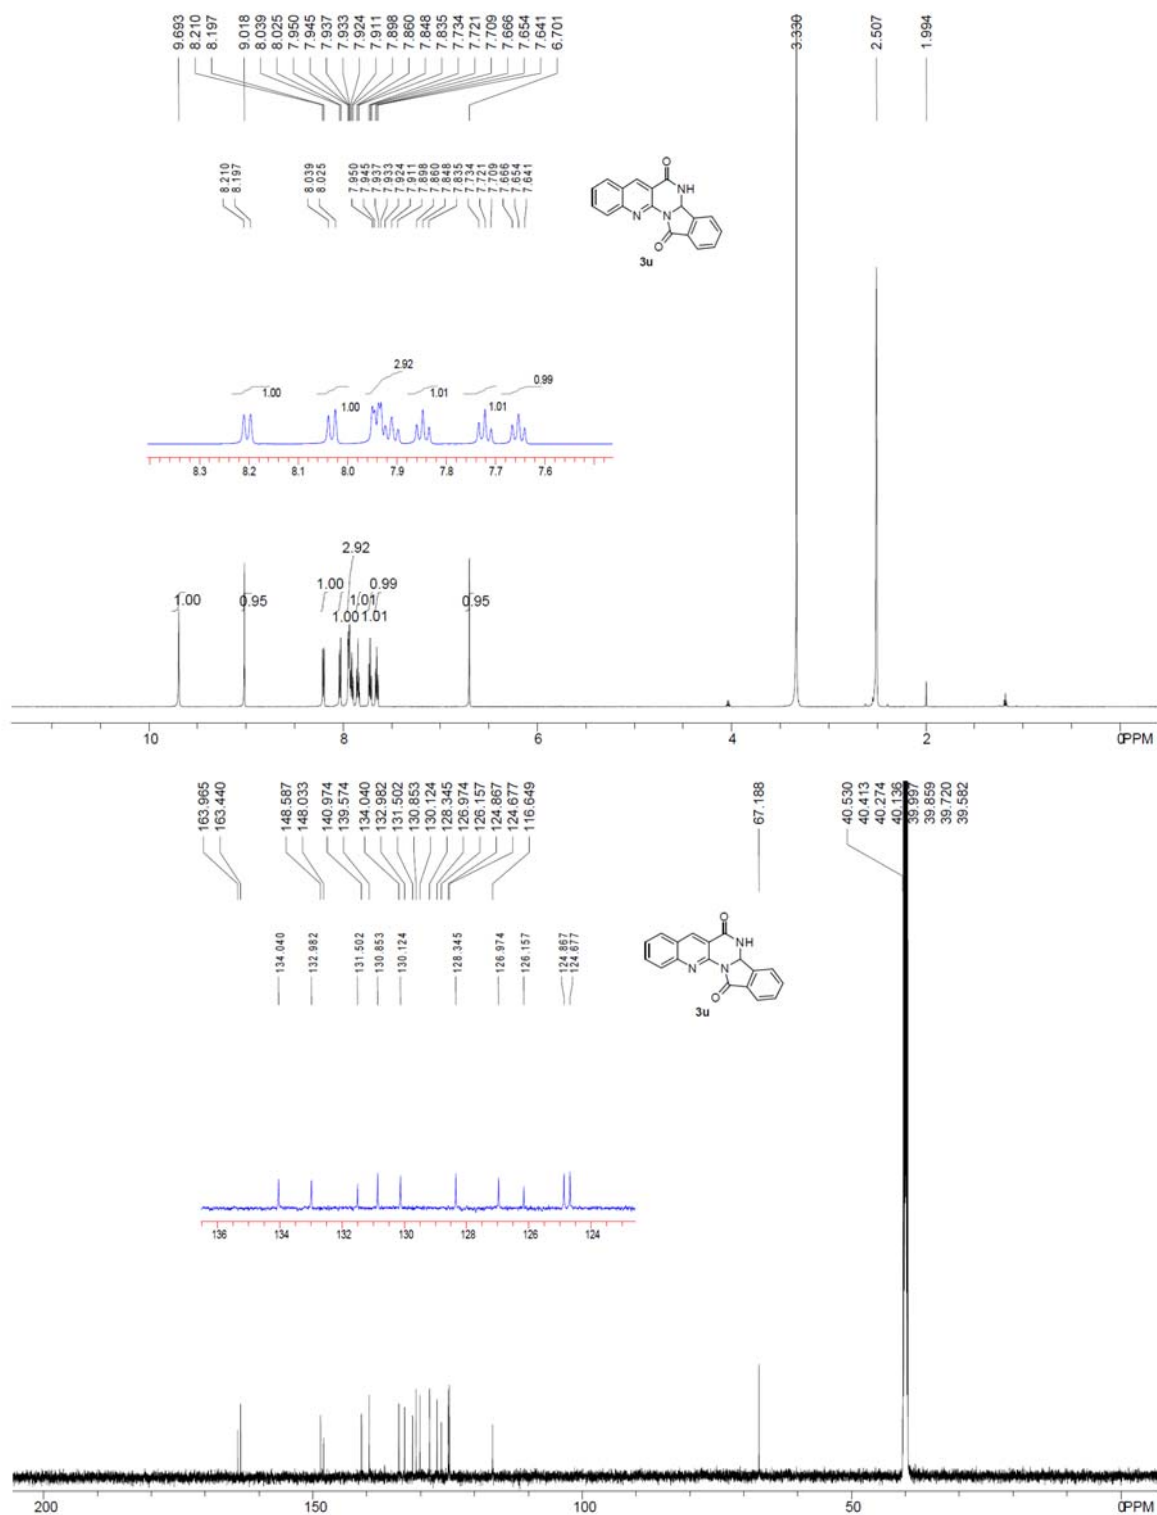

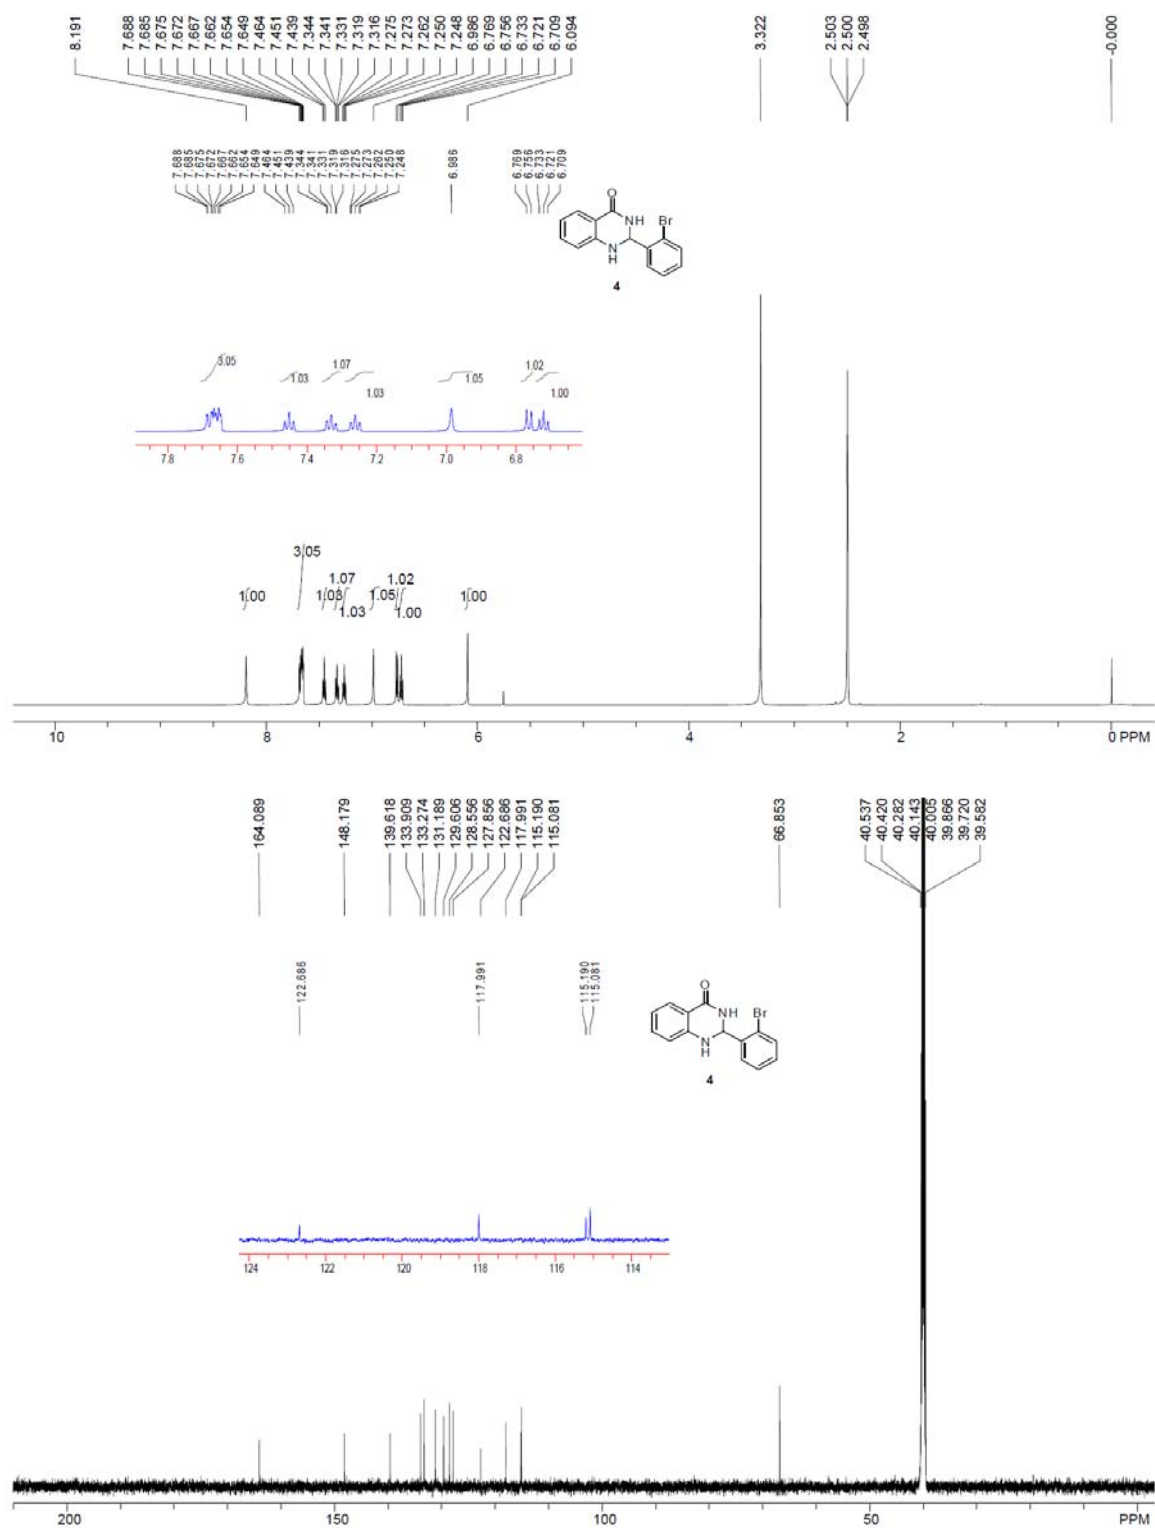

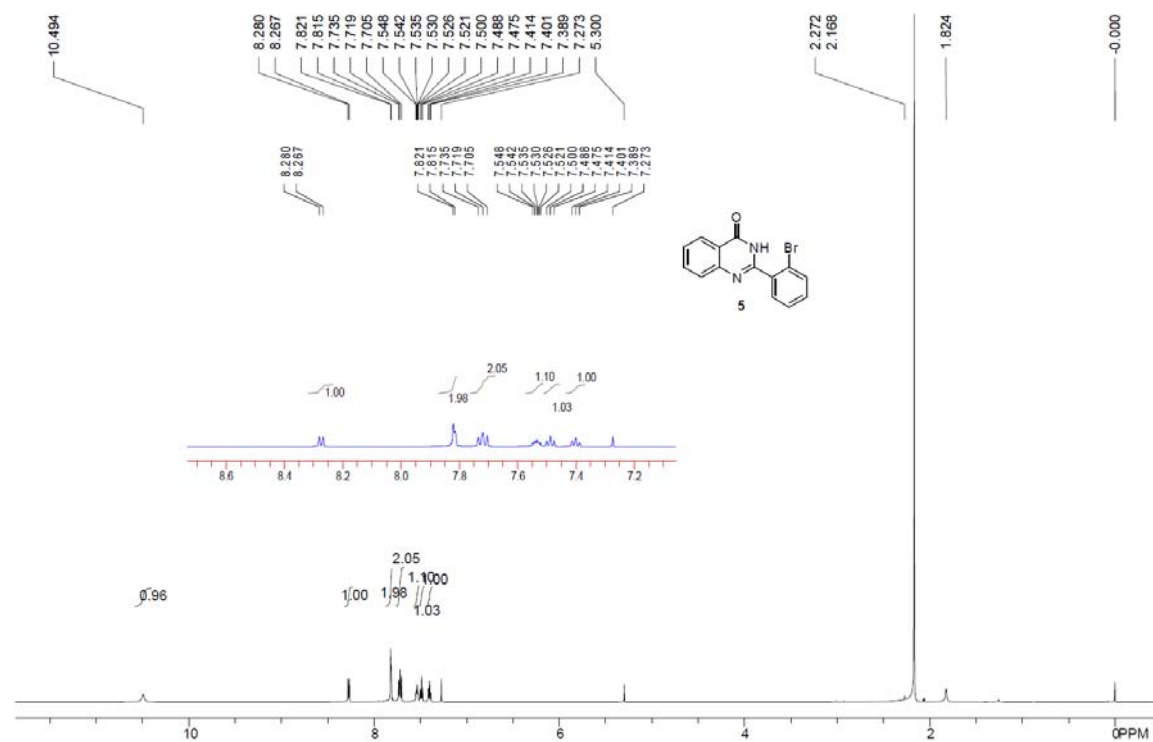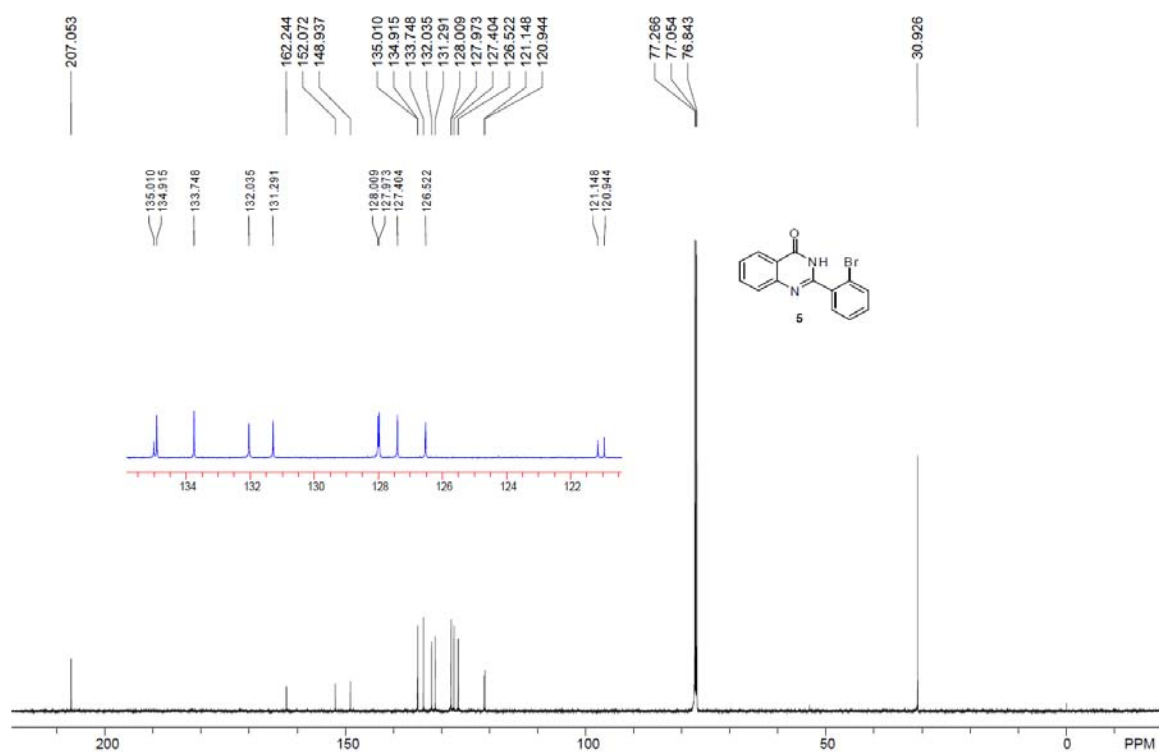

Supplement: c7ob00256d1.pdf [file c7ob00256d1.pdf]
